# Supplementary material for: Implementation and evaluation of personal genetic testing as part of genomics analysis courses in German universities
Source: BMC Med Genomics. 2023 Apr 5;16:73. doi: 10.1186/s12920-023-01503-0 (PMC10074719; doi:10.1186/s12920-023-01503-0)
Supplement: Supplementary file 2 — Additional file 2. List of variants that were returned to students during the AYPG course. [file 12920_2023_1503_MOESM2_ESM.xlsx]

## Sheet: Variants_AYPG_supplement
Supplement 2. List of variants that were returned to students during the AYPG course.
rsID	Chr	Pos	Ref Allele	Alt Allele	Effect Allele	Group	Trait
rs104886457	9	97864024	G	A	A	Carrier	Fanconi Anemia (FANCC-related)
rs104886459	9	98011507	C	Del	Del	Carrier	Fanconi Anemia (FANCC-related)
rs104886461	19	7591645	A	G	G	Carrier	Mucolipidosis IV
rs1050828	X	153764217	C	T	T	Carrier	G6PD Deficiency
rs1050829	X	153763492	T	C	C	Carrier	G6PD Deficiency
rs111033171	9	111662096	A	G	G	Carrier	Familial Dysautonomia
rs111033199	7	107312690	G	T	T	Carrier	Pendred Syndrome
rs111033244	7	107330570	A	G	G	Carrier	Pendred Syndrome
rs111033260	10	56077174	G	A	A	Carrier	Usher Syndrome Type I (PCDH15-related)
rs111033307	7	107334918	T	G	G	Carrier	Pendred Syndrome
rs11466023	16	3299586	G	A	A	Carrier	Familial Mediterranean Fever
rs119466000	2	44201383	G	A	A	Carrier	Leigh Syndrome, French Canadian Type (LSFC)
rs120074117	11	6415434	G	T	T	Carrier	Niemann-Pick Disease Type A
rs120074124	11	6413206	T	C	C	Carrier	Niemann-Pick Disease Type A
rs121434280	1	76198409	T	C	C	Carrier	Medium-Chain Acyl-CoA Dehydrogenase (MCAD) Deficiency
rs121434281	1	76215129	C	T	T	Carrier	Medium-Chain Acyl-CoA Dehydrogenase (MCAD) Deficiency
rs121907954	15	72642859	C	T	T	Carrier	Tay-Sachs Disease
rs121907970	15	72642925	G	A	A	Carrier	Tay-Sachs Disease
rs121908362	7	107350577	A	G	G	Carrier	Pendred Syndrome
rs121909011	7	117180284	C	T	T	Carrier	Cystic Fibrosis
rs137852695	1	40557070	T	A	A	Carrier	Neuronal Ceroid Lipofuscinosis (PPT1-related)
rs137852696	1	40558081	T	G	G	Carrier	Neuronal Ceroid Lipofuscinosis (PPT1-related)
rs137852700	1	40555167	G	A	A	Carrier	Neuronal Ceroid Lipofuscinosis (PPT1-related)
rs138058578	15	72642919	G	A	A	Carrier	Tay-Sachs Disease
rs147324677	15	72638575	C	G	G	Carrier	Tay-Sachs Disease
rs1800546	9	104189856	C	G	G	Carrier	Hereditary Fructose Intolerance
rs1801175	17	41055964	C	T	T	Carrier	Glycogen Storage Disease Type 1a
rs1805137	6	137219351	T	A	A	Carrier	Rhizomelic Chondrodysplasia Punctata Type 1 (RCDP1)
rs28929474	14	94844947	C	T	T	Carrier	Alpha-1-antitrypsin deficiency
rs28933693	17	48245014	C	T	T	Carrier	Limb-girdle Muscular Dystrophy
rs28936383	4	52895065	G	C	C	Carrier	Limb-girdle Muscular Dystrophy
rs28936415	16	8905010	G	A	A	Carrier	Congenital Disorder of Glycosylation Type 1a (PMM2-CDG)
rs28937900	19	47259533	C	A	A	Carrier	Limb-girdle Muscular Dystrophy
rs28939086	7	107330665	A	C	C	Carrier	Pendred Syndrome
rs28940279	17	3402294	A	C	C	Carrier	Canavan Disease
rs28940574	17	3402354	C	A	A	Carrier	Canavan Disease
rs28940578	16	3293405	C	T	T	Carrier	Familial Mediterranean Fever
rs28940579	16	3293310	A	G	G	Carrier	Familial Mediterranean Fever
rs33915217	11	5248155	C	G	G	Carrier	Beta Thalassemia
rs33944208	11	5248389	G	T	T	Carrier	Beta Thalassemia
rs33950507	11	5248173	C	T	T	Carrier	Beta Thalassemia
rs33971440	11	5248159	C	T	T	Carrier	Beta Thalassemia
rs34451549	11	5247153	G	A	A	Carrier	Beta Thalassemia
rs34598529	11	5248330	T	C	C	Carrier	Beta Thalassemia
rs35004220	11	5248050	C	T	T	Carrier	Beta Thalassemia
rs373715782	1	76211507	C	T	T	Carrier	Medium-Chain Acyl-CoA Dehydrogenase (MCAD) Deficiency
rs3743930	16	3304626	C	G	G	Carrier	Familial Mediterranean Fever
rs386834233	6	80910740	G	A	A	Carrier	Maple Syrup Urine Disease Type 1B
rs3918290	1	97915614	C	T	T	Carrier	DPD Deficiency
rs398124502	6	51612725	T	Del	Del	Carrier	Autosomal Recessive Polycystic Kidney Disease
rs6025	1	169519049	C	T	T	Carrier	Factor V Leiden
rs61750420	7	92130876	C	T	T	Carrier	Zellweger Syndrome Spectrum
rs61752717	16	3293407	T	C	C	Carrier	Familial Mediterranean Fever
rs72547571	17	19566648	C	T	T	Carrier	Sjoegren-Larsson Syndrome
rs74597325	7	117227865	C	T	T	Carrier	Cystic Fibrosis
rs74767530	7	117267591	C	T	T	Carrier	Cystic Fibrosis
rs75039782	7	117280015	C	T	T	Carrier	Cystic Fibrosis
rs75096551	7	117246808	G	A	A	Carrier	Cystic Fibrosis
rs75527207	7	117227860	G	A	A	Carrier	Cystic Fibrosis
rs75961395	7	117149177	G	A	A	Carrier	Cystic Fibrosis
rs76173977	15	72640388	C	T	T	Carrier	Tay-Sachs Disease
rs76713772	7	117227792	G	A	A	Carrier	Cystic Fibrosis
rs76917243	9	104189780	G	T	T	Carrier	Hereditary Fructose Intolerance
rs77010898	7	117282620	G	A	A	Carrier	Cystic Fibrosis
rs77188391	7	117174420	G	T	T	Carrier	Cystic Fibrosis
rs77931234	1	76226846	A	C	C	Carrier	Medium-Chain Acyl-CoA Dehydrogenase (MCAD) Deficiency
rs78340951	9	104184181	G	C	C	Carrier	Hereditary Fructose Intolerance
rs78756941	7	117171169	G	T	T	Carrier	Cystic Fibrosis
rs80034486	7	117292931	C	G	G	Carrier	Cystic Fibrosis
rs80338794	6	74354306	G	A	A	Carrier	Salla Disease
rs80338848	7	107315496	T	C	C	Carrier	Pendred Syndrome
rs80338895	15	80460605	G	T	T	Carrier	Tyrosinemia Type I
rs80338898	15	80465431	C	T	T	Carrier	Tyrosinemia Type I
rs80338901	15	80472572	G	A	A	Carrier	Tyrosinemia Type I
rs80356680	1	209823368	G	A	A	Carrier	Junctional Epidermolysis Bullosa (LAMB3-related)
rs80356682	1	209799066	G	A	A	Carrier	Junctional Epidermolysis Bullosa (LAMB3-related)
rs80356769	1	155205563	C	A	A	Carrier	Gaucher Disease
rs104895094	16	3293403	T	C	C	Carrier	Familial Mediterranean Fever
rs121908755	7	117227854	G	A	A	Carrier	Cystic Fibrosis
rs28940580	16	3293447	C	G	G	Carrier	Familial Mediterranean Fever
rs33960103	11	5248160	C	G	G	Carrier	Beta Thalassemia
rs77646904	7	117199683	G	T	T	Carrier	Cystic Fibrosis
rs80055610	7	117227887	G	C	C	Carrier	Cystic Fibrosis
rs1057910	10	96741053	A	C	C	Drugs	Phenytoin Sensitivity (Epilepsy Drug); Warfarin (Coumadin) Sensitivity; Sulfonylurea Metabolism
rs1142345	6	18130918	T	C	C	Drugs	Thiopurine Methyltransferase Activity
rs12979860	19	39738787	C	T	T	Drugs	Efficacy of peginterferon alfa-2a, peginterferon alfa-2b, and ribavirin for Hepatitis C
rs1799807	3	165548529	T	C	C	Drugs	Pseudocholinesterase Deficiency
rs1800460	6	18139228	C	T	T	Drugs	Thiopurine Methyltransferase Activity
rs1800462	6	18143955	C	G	G	Drugs	Thiopurine Methyltransferase Activity
rs1800497	11	113270828	G	A	A	Drugs	Bupropion efficacy
rs2395029	6	31431780	T	G	G	Drugs	Abacavir Hypersensitivity
rs28933389	3	165548010	G	A	A	Drugs	Pseudocholinesterase Deficiency
rs28933390	3	165547569	C	A	A	Drugs	Pseudocholinesterase Deficiency
rs41291556	10	96535173	T	C	C	Drugs	Clopidogrel (Plavix) Efficacy (CYP2C19-related); Proton Pump Inhibitor (PPI) Metabolism (CYP2C19-related)
rs4149056	12	21331549	T	C	C	Drugs	Simvastatin-Induced Myopathy
rs4986893	10	96540410	G	A	A	Drugs	Clopidogrel (Plavix) Efficacy (CYP2C19-related); Proton Pump Inhibitor (PPI) Metabolism (CYP2C19-related)
rs671	12	112241766	G	A	A	Drugs	Acetaldehyde Toxicity
rs776746	7	99270539	T	C	C	Drugs	Tacrolimus dosage
rs8099917	19	39743165	T	G	G	Drugs	Hepatitis C Treatment Response
rs12248560	10	96521657	C	T	T	Drugs	Clopidogrel (Plavix) Efficacy (CYP2C19-related); Proton Pump Inhibitor (PPI) Metabolism (CYP2C19-related)
rs9923231	16	31107689	C	T	T	Drugs	Warfarin (Coumadin) Sensitivity
rs2187668	6	32605884	C	T	T	Health	Celiac Disease
rs7454108	6	32681483	T	C	C	Health	Celiac Disease
rs12055409	6	33801510	A	G	G	Wellness	Hand Grip Strength/Muscle Strength
rs12821256	12	89328335	T	C	C	Wellness	Blond Hair
rs12896399	14	92773663	G	T	T	Wellness	Blond Hair
rs12913832	15	28365618	A	G	G	Wellness	Eye color
rs1393350	11	89011046	G	A	A	Wellness	Eye color
rs1667394	15	28530182	C	T	T	Wellness	Blond Hair
rs16891982	5	33951693	C	G	C	Wellness	Eye color
rs17646946	1	152062767	G	A	A	Wellness	Hair Curl
rs17822931	16	48258198	C	T	T	Wellness	Earwax Type
rs1800407	15	28230318	C	T	C	Wellness	Eye color
rs1801133	1	11856378	G	A	A	Wellness	Folate Metabolism
rs1805008	16	89986144	C	T	T	Wellness	Red Hair
rs2003046	1	11032827	C	A	A	Wellness	Male Pattern Baldness
rs2073963	7	18877874	T	G	G	Wellness	Male Pattern Baldness
rs2273555	10	104127171	G	A	A	Wellness	Hand Grip Strength/Muscle Strength
rs3923809	6	38440970	A	G	A	Wellness	Sleep movement
rs4410790	7	17284577	T	C	T	Wellness	Coffee consumption
rs4481887	1	248496863	A	G	A	Wellness	Asparagus Odor Detection (Asparagus anosmia)
rs4988235	2	136608646	G	A	G	Wellness	Lactose Intolerance (European Populations)
rs5751876	22	24837301	T	C	T	Wellness	Coffee consumption
rs6625163	X	66510984	G	A	G	Wellness	Male Pattern Baldness
rs713598	7	141673345	C	G	G	Wellness	Bitter Taste Perception
rs762551	15	75041917	C	A	A	Wellness	Coffee metabolizer
rs9287638	2	239694631	C	A	A	Wellness	Male Pattern Baldness
rs1805007	16	89986117	C	T	T	Wellness	Red Hair
