# Supplementary material for: Implementation and evaluation of personal genetic testing as part of genomics analysis courses in German universities
Source: BMC Med Genomics. 2023 Apr 5;16:73. doi: 10.1186/s12920-023-01503-0 (PMC10074719; doi:10.1186/s12920-023-01503-0)
Supplement: Supplementary file 7 — Additional file 7. Aggregated questionnaire response data. [file 12920_2023_1503_MOESM7_ESM.xlsx]

## Sheet: aggregated_data
Supplement 7. Aggregated questionnaire response data.
uni	course.year	questionnaire	question.id	question.text	responses	responses.json
HPI	SoSe 2020	Q1	IO03	Please select your choice below:	I wish to continue with the questionnaire: 15	{"I wish to continue with the questionnaire":{"count":15}}
HPI	SoSe 2020	Q2	IO03	Please select your choice below:	I wish to continue with the questionnaire: 14	{"I wish to continue with the questionnaire":{"count":14}}
HPI	SoSe 2020	Q3	IO03	Please select your choice below:	I wish to continue with the questionnaire: 10	{"I wish to continue with the questionnaire":{"count":10}}
HPI	SoSe 2020	Q1	GC03_01	Please state whether you understood the following concepts: Option: Variant	Definitely yes: 10 Probably yes: 4 Neutral: 1	{"Definitely yes":{"count":10},"Probably yes":{"count":4},"Neutral":{"count":1}}
HPI	SoSe 2020	Q2	GC03_01	Please state whether you understood the following concepts: Option: Variant	Definitely yes: 13 Neutral: 1	{"Definitely yes":{"count":13},"Neutral":{"count":1}}
HPI	SoSe 2020	Q3	GC03_01	Please state whether you understood the following concepts: Option: Variant	Definitely yes: 10	{"Definitely yes":{"count":10}}
HPI	SoSe 2020	Q1	GC03_02	Please state whether you understood the following concepts: Option: Genotyping	Definitely yes: 10 Probably yes: 5	{"Definitely yes":{"count":10},"Probably yes":{"count":5}}
HPI	SoSe 2020	Q2	GC03_02	Please state whether you understood the following concepts: Option: Genotyping	Definitely yes: 13 Neutral: 1	{"Definitely yes":{"count":13},"Neutral":{"count":1}}
HPI	SoSe 2020	Q3	GC03_02	Please state whether you understood the following concepts: Option: Genotyping	Definitely yes: 10	{"Definitely yes":{"count":10}}
HPI	SoSe 2020	Q1	GC03_03	Please state whether you understood the following concepts: Option: Array technology	Definitely yes: 4 Probably no: 2 Probably yes: 7 Neutral: 2	{"Definitely yes":{"count":4},"Probably no":{"count":2},"Probably yes":{"count":7},"Neutral":{"count":2}}
HPI	SoSe 2020	Q2	GC03_03	Please state whether you understood the following concepts: Option: Array technology	Neutral: 3 Probably yes: 4 Definitely yes: 5 Probably no: 2	{"Neutral":{"count":3},"Probably yes":{"count":4},"Definitely yes":{"count":5},"Probably no":{"count":2}}
HPI	SoSe 2020	Q3	GC03_03	Please state whether you understood the following concepts: Option: Array technology	Definitely yes: 7 Probably yes: 2 Probably no: 1	{"Definitely yes":{"count":7},"Probably yes":{"count":2},"Probably no":{"count":1}}
HPI	SoSe 2020	Q1	GC03_04	Please state whether you understood the following concepts: Option: Whole genome sequencing	Definitely yes: 11 Probably yes: 3 Neutral: 1	{"Definitely yes":{"count":11},"Probably yes":{"count":3},"Neutral":{"count":1}}
HPI	SoSe 2020	Q2	GC03_04	Please state whether you understood the following concepts: Option: Whole genome sequencing	Probably yes: 2 Definitely yes: 10 Probably no: 1 Neutral: 1	{"Probably yes":{"count":2},"Definitely yes":{"count":10},"Probably no":{"count":1},"Neutral":{"count":1}}
HPI	SoSe 2020	Q3	GC03_04	Please state whether you understood the following concepts: Option: Whole genome sequencing	Definitely yes: 7 Probably yes: 2 Probably no: 1	{"Definitely yes":{"count":7},"Probably yes":{"count":2},"Probably no":{"count":1}}
HPI	SoSe 2020	Q1	GC03_05	Please state whether you understood the following concepts: Option: The difference betreen array technology and whole genome sequencing	Definitely yes: 4 Probably no: 2 Probably yes: 5 Neutral: 4	{"Definitely yes":{"count":4},"Probably no":{"count":2},"Probably yes":{"count":5},"Neutral":{"count":4}}
HPI	SoSe 2020	Q2	GC03_05	Please state whether you understood the following concepts: Option: The difference betreen array technology and whole genome sequencing	Neutral: 4 Definitely yes: 8 Probably no: 2	{"Neutral":{"count":4},"Definitely yes":{"count":8},"Probably no":{"count":2}}
HPI	SoSe 2020	Q3	GC03_05	Please state whether you understood the following concepts: Option: The difference betreen array technology and whole genome sequencing	Definitely yes: 7 Probably yes: 3	{"Definitely yes":{"count":7},"Probably yes":{"count":3}}
HPI	SoSe 2020	Q1	GC04	Did you get yourself already genotyped outside of this course?	No: 13 Yes: 1 Not answered: 1	{"No":{"count":13},"Yes":{"count":1},"Not answered":{"count":1}}
HPI	SoSe 2020	Q1	MN02_01	Why did you enroll for the course? Option: I want to receive my own genomic data	I strongly agree: 7 I agree: 8	{"I strongly agree":{"count":7},"I agree":{"count":8}}
HPI	SoSe 2020	Q1	MN02_02	Why did you enroll for the course? Option: I want to learn about genome analysis	I strongly agree: 14 I agree: 1	{"I strongly agree":{"count":14},"I agree":{"count":1}}
HPI	SoSe 2020	Q1	MN02_03	Why did you enroll for the course? Option: I want to analyze my own data	I strongly agree: 11 I agree: 4	{"I strongly agree":{"count":11},"I agree":{"count":4}}
HPI	SoSe 2020	Q1	MN02_04	Why did you enroll for the course? Option: I need the credit points	I strongly disagree: 2 I strongly agree: 3 I disagree: 2 Neutral: 3 I agree: 5	{"I strongly disagree":{"count":2},"I strongly agree":{"count":3},"I disagree":{"count":2},"Neutral":{"count":3},"I agree":{"count":5}}
HPI	SoSe 2020	Q1	MN02_05	Why did you enroll for the course? Option: The course sounded interesting	I strongly agree: 14 I agree: 1	{"I strongly agree":{"count":14},"I agree":{"count":1}}
HPI	SoSe 2020	Q1	ES02_01	Please answer whether you expect to learn about the following topics. Option: Genome-wide association studies	Neutral: 3 Definitely yes: 7 Probably yes: 4 Not answered: 1	{"Neutral":{"count":3},"Definitely yes":{"count":7},"Probably yes":{"count":4},"Not answered":{"count":1}}
HPI	SoSe 2020	Q1	ES02_02	Please answer whether you expect to learn about the following topics. Option: Ethical implications of genome analysis	Probably yes: 6 Definitely yes: 8 Neutral: 1	{"Probably yes":{"count":6},"Definitely yes":{"count":8},"Neutral":{"count":1}}
HPI	SoSe 2020	Q1	ES02_03	Please answer whether you expect to learn about the following topics. Option: Legal foundations of genome analysis in Germany	Neutral: 3 Definitely yes: 6 Probably yes: 5 Definitely no: 1	{"Neutral":{"count":3},"Definitely yes":{"count":6},"Probably yes":{"count":5},"Definitely no":{"count":1}}
HPI	SoSe 2020	Q1	ES02_04	Please answer whether you expect to learn about the following topics. Option: Comparison of legal foundations of genome analysis in Germany to other countries	Neutral: 4 Probably yes: 5 Definitely yes: 5 Probably no: 1	{"Neutral":{"count":4},"Probably yes":{"count":5},"Definitely yes":{"count":5},"Probably no":{"count":1}}
HPI	SoSe 2020	Q1	ES02_05	Please answer whether you expect to learn about the following topics. Option: Introduction to genotyping	Definitely yes: 10 Probably yes: 4 Neutral: 1	{"Definitely yes":{"count":10},"Probably yes":{"count":4},"Neutral":{"count":1}}
HPI	SoSe 2020	Q1	ES02_06	Please answer whether you expect to learn about the following topics. Option: Introduction to sequencing	Definitely yes: 10 Probably yes: 3 Neutral: 2	{"Definitely yes":{"count":10},"Probably yes":{"count":3},"Neutral":{"count":2}}
HPI	SoSe 2020	Q1	ES02_07	Please answer whether you expect to learn about the following topics. Option: Social implications of genome analysis	Probably yes: 6 Definitely yes: 8 Neutral: 1	{"Probably yes":{"count":6},"Definitely yes":{"count":8},"Neutral":{"count":1}}
HPI	SoSe 2020	Q1	ES02_08	Please answer whether you expect to learn about the following topics. Option: Pharmacogenomics	Definitely yes: 10 Probably yes: 4 Neutral: 1	{"Definitely yes":{"count":10},"Probably yes":{"count":4},"Neutral":{"count":1}}
HPI	SoSe 2020	Q1	ES02_09	Please answer whether you expect to learn about the following topics. Option: Ancestry analysis	Definitely yes: 9 Neutral: 1 Probably yes: 4 Probably no: 1	{"Definitely yes":{"count":9},"Neutral":{"count":1},"Probably yes":{"count":4},"Probably no":{"count":1}}
HPI	SoSe 2020	Q1	ES02_10	Please answer whether you expect to learn about the following topics. Option: Hands-on work with genetic data	Definitely yes: 14 Probably yes: 1	{"Definitely yes":{"count":14},"Probably yes":{"count":1}}
HPI	SoSe 2020	Q1	ES02_11	Please answer whether you expect to learn about the following topics. Option: Options for direct to consumer testing (in Germany and world-wide)	Definitely yes: 6 Probably no: 2 Probably yes: 4 Neutral: 3	{"Definitely yes":{"count":6},"Probably no":{"count":2},"Probably yes":{"count":4},"Neutral":{"count":3}}
HPI	SoSe 2020	Q1	ES02_12	Please answer whether you expect to learn about the following topics. Option: Analyzing wellness-traits	Definitely yes: 8 Neutral: 4 Probably yes: 3	{"Definitely yes":{"count":8},"Neutral":{"count":4},"Probably yes":{"count":3}}
HPI	SoSe 2020	Q1	ES02_13	Please answer whether you expect to learn about the following topics. Option: Tools to analyze and interpret (my own) genomic data	Definitely yes: 13 Probably yes: 2	{"Definitely yes":{"count":13},"Probably yes":{"count":2}}
HPI	SoSe 2020	Q1	DU02	Do you plan to get yourself genotyped?	Definitely yes: 11 Probably yes: 3 I don't know: 1	{"Definitely yes":{"count":11},"Probably yes":{"count":3},"I don't know":{"count":1}}
HPI	SoSe 2020	Q1	DU03	At the present time, which of the following options would you prefer? Please check one.	Option 1: I would like to analyze my own genome: 15	{"Option 1: I would like to analyze my own genome":{"count":15}}
HPI	SoSe 2020	Q1	DU05_01	In light of your choice to analyze your own genome or not, please respond to the following statements: Option: I know which options are available to me	I strongly agree: 7 I agree: 5 I disagree: 1 I don't know: 2	{"I strongly agree":{"count":7},"I agree":{"count":5},"I disagree":{"count":1},"I don't know":{"count":2}}
HPI	SoSe 2020	Q1	DU05_02	In light of your choice to analyze your own genome or not, please respond to the following statements: Option: I know the benefits of each option	I strongly agree: 4 I agree: 4 I disagree: 4 I don't understand: 1 I don't know: 2	{"I strongly agree":{"count":4},"I agree":{"count":4},"I disagree":{"count":4},"I don't understand":{"count":1},"I don't know":{"count":2}}
HPI	SoSe 2020	Q1	DU05_03	In light of your choice to analyze your own genome or not, please respond to the following statements: Option: I know the risks of each option	I strongly agree: 3 Neutral: 2 I disagree: 4 I agree: 4 I don't know: 2	{"I strongly agree":{"count":3},"Neutral":{"count":2},"I disagree":{"count":4},"I agree":{"count":4},"I don't know":{"count":2}}
HPI	SoSe 2020	Q1	DU05_04	In light of your choice to analyze your own genome or not, please respond to the following statements: Option: I am clear about which risks and benefits matter most to me	I strongly agree: 3 I agree: 4 I disagree: 3 Neutral: 3 I don't know: 2	{"I strongly agree":{"count":3},"I agree":{"count":4},"I disagree":{"count":3},"Neutral":{"count":3},"I don't know":{"count":2}}
HPI	SoSe 2020	Q1	DU05_05	In light of your choice to analyze your own genome or not, please respond to the following statements: Option: I feel I have made an informed choice	I strongly agree: 3 I agree: 5 Neutral: 2 I disagree: 3 I prefer not to say: 1 I don't know: 1	{"I strongly agree":{"count":3},"I agree":{"count":5},"Neutral":{"count":2},"I disagree":{"count":3},"I prefer not to say":{"count":1},"I don't know":{"count":1}}
HPI	SoSe 2020	Q1	DU05_06	In light of your choice to analyze your own genome or not, please respond to the following statements: Option: I expect to stick with my decision	I strongly agree: 7 I agree: 5 Neutral: 3	{"I strongly agree":{"count":7},"I agree":{"count":5},"Neutral":{"count":3}}
HPI	SoSe 2020	Q1	DU05_07	In light of your choice to analyze your own genome or not, please respond to the following statements: Option: I am satisfied with my decision	I strongly agree: 8 I agree: 4 Neutral: 3	{"I strongly agree":{"count":8},"I agree":{"count":4},"Neutral":{"count":3}}
HPI	SoSe 2020	Q1	DU06_01	Which of the analyses below do you plan to conduct <u>with your own data</u>? Option: I am not interested in my own data. I want to learn how to prepare and analyze genetic data for research in general	Definitely no: 4 Probably yes: 3 Neutral: 4 Definitely yes: 1 Probably no: 2 I don't understand: 1	{"Definitely no":{"count":4},"Probably yes":{"count":3},"Neutral":{"count":4},"Definitely yes":{"count":1},"Probably no":{"count":2},"I don't understand":{"count":1}}
HPI	SoSe 2020	Q2	DU06_01	Which of the analyses below do you plan to conduct <u>with your own data</u>? Option: I am not interested in my own data. I want to learn how to prepare and analyze genetic data for research in general	Definitely no: 3 Neutral: 3 Probably yes: 3 Definitely yes: 3 Probably no: 1 I prefer not to say: 1	{"Definitely no":{"count":3},"Neutral":{"count":3},"Probably yes":{"count":3},"Definitely yes":{"count":3},"Probably no":{"count":1},"I prefer not to say":{"count":1}}
HPI	SoSe 2020	Q1	DU06_06	Which of the analyses below do you plan to conduct <u>with your own data</u>? Option: I plan to perform variant annotation of my own data, i.e. database queries to find out the effect or function of a genetic variant	Definitely yes: 6 Probably yes: 8 Neutral: 1	{"Definitely yes":{"count":6},"Probably yes":{"count":8},"Neutral":{"count":1}}
HPI	SoSe 2020	Q2	DU06_06	Which of the analyses below do you plan to conduct <u>with your own data</u>? Option: I plan to perform variant annotation of my own data, i.e. database queries to find out the effect or function of a genetic variant	Definitely yes: 9 Probably yes: 4 I prefer not to say: 1	{"Definitely yes":{"count":9},"Probably yes":{"count":4},"I prefer not to say":{"count":1}}
HPI	SoSe 2020	Q1	DU06_02	Which of the analyses below do you plan to conduct <u>with your own data</u>? Option: I want to assess my personal disease risk using my own data	Definitely yes: 7 Probably yes: 5 Neutral: 3	{"Definitely yes":{"count":7},"Probably yes":{"count":5},"Neutral":{"count":3}}
HPI	SoSe 2020	Q2	DU06_02	Which of the analyses below do you plan to conduct <u>with your own data</u>? Option: I want to assess my personal disease risk using my own data	Definitely yes: 5 Probably no: 1 Probably yes: 7 I prefer not to say: 1	{"Definitely yes":{"count":5},"Probably no":{"count":1},"Probably yes":{"count":7},"I prefer not to say":{"count":1}}
HPI	SoSe 2020	Q1	DU06_03	Which of the analyses below do you plan to conduct <u>with your own data</u>? Option: I want to calculate my genetic ancestry	Definitely yes: 6 Probably yes: 7 Neutral: 2	{"Definitely yes":{"count":6},"Probably yes":{"count":7},"Neutral":{"count":2}}
HPI	SoSe 2020	Q2	DU06_03	Which of the analyses below do you plan to conduct <u>with your own data</u>? Option: I want to calculate my genetic ancestry	Definitely yes: 4 Probably yes: 8 Neutral: 1 I prefer not to say: 1	{"Definitely yes":{"count":4},"Probably yes":{"count":8},"Neutral":{"count":1},"I prefer not to say":{"count":1}}
HPI	SoSe 2020	Q1	DU06_04	Which of the analyses below do you plan to conduct <u>with your own data</u>? Option: I plan to calculate genetic scores, e.g. for wellness traits like eye color or male pattern baldness, using my own data	Definitely yes: 6 Probably yes: 7 Probably no: 1 Neutral: 1	{"Definitely yes":{"count":6},"Probably yes":{"count":7},"Probably no":{"count":1},"Neutral":{"count":1}}
HPI	SoSe 2020	Q2	DU06_04	Which of the analyses below do you plan to conduct <u>with your own data</u>? Option: I plan to calculate genetic scores, e.g. for wellness traits like eye color or male pattern baldness, using my own data	Definitely yes: 7 Probably yes: 4 Neutral: 2 I prefer not to say: 1	{"Definitely yes":{"count":7},"Probably yes":{"count":4},"Neutral":{"count":2},"I prefer not to say":{"count":1}}
HPI	SoSe 2020	Q1	DU06_05	Which of the analyses below do you plan to conduct <u>with your own data</u>? Option: I plan to explore my pharmacogenomic markers, i.e. how my genes affect my response to drugs	Definitely yes: 9 Neutral: 2 Probably yes: 4	{"Definitely yes":{"count":9},"Neutral":{"count":2},"Probably yes":{"count":4}}
HPI	SoSe 2020	Q2	DU06_05	Which of the analyses below do you plan to conduct <u>with your own data</u>? Option: I plan to explore my pharmacogenomic markers, i.e. how my genes affect my response to drugs	Definitely yes: 9 Probably yes: 4 I prefer not to say: 1	{"Definitely yes":{"count":9},"Probably yes":{"count":4},"I prefer not to say":{"count":1}}
HPI	SoSe 2020	Q1	DU07_01	What is your opinion regarding the following reasons <u>in favor of</u> genome analysis in the context of this course? Option: To satisfy general curiosity	I strongly agree: 8 Neutral: 2 I agree: 5	{"I strongly agree":{"count":8},"Neutral":{"count":2},"I agree":{"count":5}}
HPI	SoSe 2020	Q2	DU07_01	What is your opinion regarding the following reasons <u>in favor of</u> genome analysis in the context of this course? Option: To satisfy general curiosity	I strongly agree: 8 Neutral: 1 I agree: 5	{"I strongly agree":{"count":8},"Neutral":{"count":1},"I agree":{"count":5}}
HPI	SoSe 2020	Q3	DU07_01	What is your opinion regarding the following reasons <u>in favor of</u> genome analysis in the context of this course? Option: To satisfy general curiosity	I agree: 4 I strongly agree: 4 I disagree: 1 Neutral: 1	{"I agree":{"count":4},"I strongly agree":{"count":4},"I disagree":{"count":1},"Neutral":{"count":1}}
HPI	SoSe 2020	Q1	DU07_02	What is your opinion regarding the following reasons <u>in favor of</u> genome analysis in the context of this course? Option: To inform family members about health risks	I agree: 4 I strongly agree: 4 I don't know: 1 Neutral: 3 I strongly disagree: 2 I disagree: 1	{"I agree":{"count":4},"I strongly agree":{"count":4},"I don't know":{"count":1},"Neutral":{"count":3},"I strongly disagree":{"count":2},"I disagree":{"count":1}}
HPI	SoSe 2020	Q2	DU07_02	What is your opinion regarding the following reasons <u>in favor of</u> genome analysis in the context of this course? Option: To inform family members about health risks	I strongly agree: 3 I agree: 6 Neutral: 3 I strongly disagree: 2	{"I strongly agree":{"count":3},"I agree":{"count":6},"Neutral":{"count":3},"I strongly disagree":{"count":2}}
HPI	SoSe 2020	Q3	DU07_02	What is your opinion regarding the following reasons <u>in favor of</u> genome analysis in the context of this course? Option: To inform family members about health risks	I agree: 2 I strongly disagree: 3 I disagree: 4 Neutral: 1	{"I agree":{"count":2},"I strongly disagree":{"count":3},"I disagree":{"count":4},"Neutral":{"count":1}}
HPI	SoSe 2020	Q1	DU07_03	What is your opinion regarding the following reasons <u>in favor of</u> genome analysis in the context of this course? Option: To understand what a patient may learn/experience	I agree: 4 I strongly agree: 10 Neutral: 1	{"I agree":{"count":4},"I strongly agree":{"count":10},"Neutral":{"count":1}}
HPI	SoSe 2020	Q2	DU07_03	What is your opinion regarding the following reasons <u>in favor of</u> genome analysis in the context of this course? Option: To understand what a patient may learn/experience	I strongly agree: 6 I agree: 6 Neutral: 2	{"I strongly agree":{"count":6},"I agree":{"count":6},"Neutral":{"count":2}}
HPI	SoSe 2020	Q3	DU07_03	What is your opinion regarding the following reasons <u>in favor of</u> genome analysis in the context of this course? Option: To understand what a patient may learn/experience	I strongly agree: 3 I agree: 7	{"I strongly agree":{"count":3},"I agree":{"count":7}}
HPI	SoSe 2020	Q1	DU07_04	What is your opinion regarding the following reasons <u>in favor of</u> genome analysis in the context of this course? Option: To help understand principles of human genetics	I agree: 2 I strongly agree: 12 Neutral: 1	{"I agree":{"count":2},"I strongly agree":{"count":12},"Neutral":{"count":1}}
HPI	SoSe 2020	Q2	DU07_04	What is your opinion regarding the following reasons <u>in favor of</u> genome analysis in the context of this course? Option: To help understand principles of human genetics	I strongly agree: 8 I agree: 6	{"I strongly agree":{"count":8},"I agree":{"count":6}}
HPI	SoSe 2020	Q3	DU07_04	What is your opinion regarding the following reasons <u>in favor of</u> genome analysis in the context of this course? Option: To help understand principles of human genetics	I disagree: 1 I strongly agree: 5 I agree: 4	{"I disagree":{"count":1},"I strongly agree":{"count":5},"I agree":{"count":4}}
HPI	SoSe 2020	Q1	DU08_01	What is your opinion regarding the following reasons <u>against</u> genome analysis in the context of this course? Option: Results are not accurate (the results are error-prone)	I strongly disagree: 1 I disagree: 6 I agree: 3 Neutral: 4 I don't know: 1	{"I strongly disagree":{"count":1},"I disagree":{"count":6},"I agree":{"count":3},"Neutral":{"count":4},"I don't know":{"count":1}}
HPI	SoSe 2020	Q2	DU08_01	What is your opinion regarding the following reasons <u>against</u> genome analysis in the context of this course? Option: Results are not accurate (the results are error-prone)	I disagree: 2 Neutral: 6 I don't know: 1 I strongly disagree: 1 I agree: 3 I strongly agree: 1	{"I disagree":{"count":2},"Neutral":{"count":6},"I don't know":{"count":1},"I strongly disagree":{"count":1},"I agree":{"count":3},"I strongly agree":{"count":1}}
HPI	SoSe 2020	Q3	DU08_01	What is your opinion regarding the following reasons <u>against</u> genome analysis in the context of this course? Option: Results are not accurate (the results are error-prone)	I agree: 3 Neutral: 5 I strongly agree: 1 I disagree: 1	{"I agree":{"count":3},"Neutral":{"count":5},"I strongly agree":{"count":1},"I disagree":{"count":1}}
HPI	SoSe 2020	Q1	DU08_02	What is your opinion regarding the following reasons <u>against</u> genome analysis in the context of this course? Option: Results are not predictive (I cannot be sure a condition indicated by the results will break out)	Neutral: 6 I disagree: 3 I agree: 3 I strongly disagree: 1 I don't know: 1 I strongly agree: 1	{"Neutral":{"count":6},"I disagree":{"count":3},"I agree":{"count":3},"I strongly disagree":{"count":1},"I don't know":{"count":1},"I strongly agree":{"count":1}}
HPI	SoSe 2020	Q2	DU08_02	What is your opinion regarding the following reasons <u>against</u> genome analysis in the context of this course? Option: Results are not predictive (I cannot be sure a condition indicated by the results will break out)	Neutral: 5 I agree: 5 I don't know: 1 I disagree: 1 I strongly agree: 2	{"Neutral":{"count":5},"I agree":{"count":5},"I don't know":{"count":1},"I disagree":{"count":1},"I strongly agree":{"count":2}}
HPI	SoSe 2020	Q3	DU08_02	What is your opinion regarding the following reasons <u>against</u> genome analysis in the context of this course? Option: Results are not predictive (I cannot be sure a condition indicated by the results will break out)	I agree: 7 Neutral: 2 I strongly agree: 1	{"I agree":{"count":7},"Neutral":{"count":2},"I strongly agree":{"count":1}}
HPI	SoSe 2020	Q1	DU08_03	What is your opinion regarding the following reasons <u>against</u> genome analysis in the context of this course? Option: I have concerns about privacy	I strongly disagree: 3 I agree: 4 I disagree: 4 Neutral: 4	{"I strongly disagree":{"count":3},"I agree":{"count":4},"I disagree":{"count":4},"Neutral":{"count":4}}
HPI	SoSe 2020	Q2	DU08_03	What is your opinion regarding the following reasons <u>against</u> genome analysis in the context of this course? Option: I have concerns about privacy	I strongly disagree: 4 Neutral: 4 I strongly agree: 2 I disagree: 3 I agree: 1	{"I strongly disagree":{"count":4},"Neutral":{"count":4},"I strongly agree":{"count":2},"I disagree":{"count":3},"I agree":{"count":1}}
HPI	SoSe 2020	Q3	DU08_03	What is your opinion regarding the following reasons <u>against</u> genome analysis in the context of this course? Option: I have concerns about privacy	I disagree: 5 I strongly disagree: 1 Neutral: 2 I agree: 1 I strongly agree: 1	{"I disagree":{"count":5},"I strongly disagree":{"count":1},"Neutral":{"count":2},"I agree":{"count":1},"I strongly agree":{"count":1}}
HPI	SoSe 2020	Q1	DU08_04	What is your opinion regarding the following reasons <u>against</u> genome analysis in the context of this course? Option: Information will not be medically useful and will not change medical decisions	I strongly disagree: 5 Neutral: 3 I disagree: 4 I agree: 3	{"I strongly disagree":{"count":5},"Neutral":{"count":3},"I disagree":{"count":4},"I agree":{"count":3}}
HPI	SoSe 2020	Q2	DU08_04	What is your opinion regarding the following reasons <u>against</u> genome analysis in the context of this course? Option: Information will not be medically useful and will not change medical decisions	I strongly disagree: 2 I agree: 3 Neutral: 4 I disagree: 4 Not answered: 1	{"I strongly disagree":{"count":2},"I agree":{"count":3},"Neutral":{"count":4},"I disagree":{"count":4},"Not answered":{"count":1}}
HPI	SoSe 2020	Q3	DU08_04	What is your opinion regarding the following reasons <u>against</u> genome analysis in the context of this course? Option: Information will not be medically useful and will not change medical decisions	Neutral: 5 I disagree: 3 I agree: 2	{"Neutral":{"count":5},"I disagree":{"count":3},"I agree":{"count":2}}
HPI	SoSe 2020	Q1	DU08_05	What is your opinion regarding the following reasons <u>against</u> genome analysis in the context of this course? Option: I get unwanted information	I strongly disagree: 6 Neutral: 4 I disagree: 4 I agree: 1	{"I strongly disagree":{"count":6},"Neutral":{"count":4},"I disagree":{"count":4},"I agree":{"count":1}}
HPI	SoSe 2020	Q2	DU08_05	What is your opinion regarding the following reasons <u>against</u> genome analysis in the context of this course? Option: I get unwanted information	I strongly disagree: 5 I agree: 4 I disagree: 2 Neutral: 3	{"I strongly disagree":{"count":5},"I agree":{"count":4},"I disagree":{"count":2},"Neutral":{"count":3}}
HPI	SoSe 2020	Q3	DU08_05	What is your opinion regarding the following reasons <u>against</u> genome analysis in the context of this course? Option: I get unwanted information	I strongly disagree: 3 I strongly agree: 3 I agree: 1 I disagree: 1 Neutral: 2	{"I strongly disagree":{"count":3},"I strongly agree":{"count":3},"I agree":{"count":1},"I disagree":{"count":1},"Neutral":{"count":2}}
HPI	SoSe 2020	Q1	DU09_01	What is your opinion regarding genotyping as part of the course? Option: I feel that I would be at a disadvantage to my classmates if I did not undergo the testing	I strongly disagree: 11 I disagree: 3 I don't know: 1	{"I strongly disagree":{"count":11},"I disagree":{"count":3},"I don't know":{"count":1}}
HPI	SoSe 2020	Q2	DU09_01	What is your opinion regarding genotyping as part of the course? Option: I feel that I would be at a disadvantage to my classmates if I did not undergo the testing	I strongly disagree: 7 I disagree: 3 I don't know: 1 Neutral: 3	{"I strongly disagree":{"count":7},"I disagree":{"count":3},"I don't know":{"count":1},"Neutral":{"count":3}}
HPI	SoSe 2020	Q3	DU09_01	What is your opinion regarding genotyping as part of the course? Option: I feel that I would be at a disadvantage to my classmates if I did not undergo the testing	I strongly disagree: 8 I disagree: 2	{"I strongly disagree":{"count":8},"I disagree":{"count":2}}
HPI	SoSe 2020	Q1	DU09_02	What is your opinion regarding genotyping as part of the course? Option: I see this as an opportunity to get a service that I would not ordinarily get	I strongly agree: 4 I agree: 10 I disagree: 1	{"I strongly agree":{"count":4},"I agree":{"count":10},"I disagree":{"count":1}}
HPI	SoSe 2020	Q2	DU09_02	What is your opinion regarding genotyping as part of the course? Option: I see this as an opportunity to get a service that I would not ordinarily get	I strongly agree: 5 I agree: 6 Neutral: 2 I disagree: 1	{"I strongly agree":{"count":5},"I agree":{"count":6},"Neutral":{"count":2},"I disagree":{"count":1}}
HPI	SoSe 2020	Q3	DU09_02	What is your opinion regarding genotyping as part of the course? Option: I see this as an opportunity to get a service that I would not ordinarily get	I strongly agree: 3 I agree: 5 Neutral: 2	{"I strongly agree":{"count":3},"I agree":{"count":5},"Neutral":{"count":2}}
HPI	SoSe 2020	Q1	DU09_03	What is your opinion regarding genotyping as part of the course? Option: I am concerned that my professors or course instructors would know who took up the offer of testing and who did not	I strongly disagree: 10 Neutral: 2 I strongly agree: 1 I disagree: 2	{"I strongly disagree":{"count":10},"Neutral":{"count":2},"I strongly agree":{"count":1},"I disagree":{"count":2}}
HPI	SoSe 2020	Q2	DU09_03	What is your opinion regarding genotyping as part of the course? Option: I am concerned that my professors or course instructors would know who took up the offer of testing and who did not	I strongly disagree: 6 I disagree: 4 Neutral: 2 I agree: 1 I strongly agree: 1	{"I strongly disagree":{"count":6},"I disagree":{"count":4},"Neutral":{"count":2},"I agree":{"count":1},"I strongly agree":{"count":1}}
HPI	SoSe 2020	Q3	DU09_03	What is your opinion regarding genotyping as part of the course? Option: I am concerned that my professors or course instructors would know who took up the offer of testing and who did not	I strongly disagree: 6 I disagree: 3 Neutral: 1	{"I strongly disagree":{"count":6},"I disagree":{"count":3},"Neutral":{"count":1}}
HPI	SoSe 2020	Q1	DU09_04	What is your opinion regarding genotyping as part of the course? Option: I am concerned that my classmates would know who took up the offer of testing and who did not	I strongly disagree: 9 Neutral: 2 I strongly agree: 1 I disagree: 3	{"I strongly disagree":{"count":9},"Neutral":{"count":2},"I strongly agree":{"count":1},"I disagree":{"count":3}}
HPI	SoSe 2020	Q2	DU09_04	What is your opinion regarding genotyping as part of the course? Option: I am concerned that my classmates would know who took up the offer of testing and who did not	I strongly disagree: 7 I disagree: 3 Neutral: 3 I agree: 1	{"I strongly disagree":{"count":7},"I disagree":{"count":3},"Neutral":{"count":3},"I agree":{"count":1}}
HPI	SoSe 2020	Q3	DU09_04	What is your opinion regarding genotyping as part of the course? Option: I am concerned that my classmates would know who took up the offer of testing and who did not	I strongly disagree: 6 I disagree: 3 Neutral: 1	{"I strongly disagree":{"count":6},"I disagree":{"count":3},"Neutral":{"count":1}}
HPI	SoSe 2020	Q1	DU09_05	What is your opinion regarding genotyping as part of the course? Option: I see this as an opportunity to get information that would help me improve my health and wellbeing	I strongly agree: 7 I agree: 4 Neutral: 3 I disagree: 1	{"I strongly agree":{"count":7},"I agree":{"count":4},"Neutral":{"count":3},"I disagree":{"count":1}}
HPI	SoSe 2020	Q2	DU09_05	What is your opinion regarding genotyping as part of the course? Option: I see this as an opportunity to get information that would help me improve my health and wellbeing	I strongly agree: 5 Neutral: 2 I agree: 7	{"I strongly agree":{"count":5},"Neutral":{"count":2},"I agree":{"count":7}}
HPI	SoSe 2020	Q3	DU09_05	What is your opinion regarding genotyping as part of the course? Option: I see this as an opportunity to get information that would help me improve my health and wellbeing	I agree: 1 I strongly agree: 1 Neutral: 4 I disagree: 3 I strongly disagree: 1	{"I agree":{"count":1},"I strongly agree":{"count":1},"Neutral":{"count":4},"I disagree":{"count":3},"I strongly disagree":{"count":1}}
HPI	SoSe 2020	Q1	DU09_06	What is your opinion regarding genotyping as part of the course? Option: I am concerned that I might get some results that would be disturbing	I disagree: 3 I strongly agree: 1 Neutral: 3 I strongly disagree: 4 I agree: 4	{"I disagree":{"count":3},"I strongly agree":{"count":1},"Neutral":{"count":3},"I strongly disagree":{"count":4},"I agree":{"count":4}}
HPI	SoSe 2020	Q2	DU09_06	What is your opinion regarding genotyping as part of the course? Option: I am concerned that I might get some results that would be disturbing	I strongly disagree: 2 I agree: 5 Neutral: 5 I disagree: 1 I strongly agree: 1	{"I strongly disagree":{"count":2},"I agree":{"count":5},"Neutral":{"count":5},"I disagree":{"count":1},"I strongly agree":{"count":1}}
HPI	SoSe 2020	Q3	DU09_06	What is your opinion regarding genotyping as part of the course? Option: I am concerned that I might get some results that would be disturbing	I agree: 5 I strongly disagree: 1 Neutral: 2 I disagree: 2	{"I agree":{"count":5},"I strongly disagree":{"count":1},"Neutral":{"count":2},"I disagree":{"count":2}}
HPI	SoSe 2020	Q1	DU09_07	What is your opinion regarding genotyping as part of the course? Option: I would only take up the offer of testing if I could get genetic counseling after I got my results back	I strongly disagree: 3 I agree: 2 I disagree: 3 Neutral: 7	{"I strongly disagree":{"count":3},"I agree":{"count":2},"I disagree":{"count":3},"Neutral":{"count":7}}
HPI	SoSe 2020	Q2	DU09_07	What is your opinion regarding genotyping as part of the course? Option: I would only take up the offer of testing if I could get genetic counseling after I got my results back	I strongly disagree: 2 I disagree: 6 I agree: 2 I strongly agree: 2 Neutral: 1 I prefer not to say: 1	{"I strongly disagree":{"count":2},"I disagree":{"count":6},"I agree":{"count":2},"I strongly agree":{"count":2},"Neutral":{"count":1},"I prefer not to say":{"count":1}}
HPI	SoSe 2020	Q3	DU09_07	What is your opinion regarding genotyping as part of the course? Option: I would only take up the offer of testing if I could get genetic counseling after I got my results back	I disagree: 3 I strongly disagree: 3 I strongly agree: 1 Neutral: 2 I agree: 1	{"I disagree":{"count":3},"I strongly disagree":{"count":3},"I strongly agree":{"count":1},"Neutral":{"count":2},"I agree":{"count":1}}
HPI	SoSe 2020	Q1	DU09_08	What is your opinion regarding genotyping as part of the course? Option: I would only take up the offer of testing if I could get genetic counseling before my sample is sent in	I strongly disagree: 3 I agree: 2 I disagree: 6 Neutral: 4	{"I strongly disagree":{"count":3},"I agree":{"count":2},"I disagree":{"count":6},"Neutral":{"count":4}}
HPI	SoSe 2020	Q2	DU09_08	What is your opinion regarding genotyping as part of the course? Option: I would only take up the offer of testing if I could get genetic counseling before my sample is sent in	I strongly disagree: 2 Neutral: 3 I disagree: 7 I agree: 1 I prefer not to say: 1	{"I strongly disagree":{"count":2},"Neutral":{"count":3},"I disagree":{"count":7},"I agree":{"count":1},"I prefer not to say":{"count":1}}
HPI	SoSe 2020	Q3	DU09_08	What is your opinion regarding genotyping as part of the course? Option: I would only take up the offer of testing if I could get genetic counseling before my sample is sent in	I disagree: 2 I strongly disagree: 3 Neutral: 4 I agree: 1	{"I disagree":{"count":2},"I strongly disagree":{"count":3},"Neutral":{"count":4},"I agree":{"count":1}}
HPI	SoSe 2020	Q1	DU09_09	What is your opinion regarding genotyping as part of the course? Option: I would be concerned that people would find out genetic or health information about me	I strongly disagree: 5 Neutral: 3 I agree: 2 I disagree: 4 I strongly agree: 1	{"I strongly disagree":{"count":5},"Neutral":{"count":3},"I agree":{"count":2},"I disagree":{"count":4},"I strongly agree":{"count":1}}
HPI	SoSe 2020	Q2	DU09_09	What is your opinion regarding genotyping as part of the course? Option: I would be concerned that people would find out genetic or health information about me	I strongly disagree: 5 Neutral: 4 I agree: 2 I disagree: 3	{"I strongly disagree":{"count":5},"Neutral":{"count":4},"I agree":{"count":2},"I disagree":{"count":3}}
HPI	SoSe 2020	Q3	DU09_09	What is your opinion regarding genotyping as part of the course? Option: I would be concerned that people would find out genetic or health information about me	I disagree: 3 I strongly disagree: 4 Neutral: 2 I agree: 1	{"I disagree":{"count":3},"I strongly disagree":{"count":4},"Neutral":{"count":2},"I agree":{"count":1}}
HPI	SoSe 2020	Q1	DU10	If it was possible in Germany, would you get yourself genotyped with array technology if you had to pay for it yourself (around €60–100)?	Probably yes: 7 Definitely yes: 2 It depends: 4 Probably no: 2	{"Probably yes":{"count":7},"Definitely yes":{"count":2},"It depends":{"count":4},"Probably no":{"count":2}}
HPI	SoSe 2020	Q2	DU10	If it was possible in Germany, would you get yourself genotyped with array technology if you had to pay for it yourself (around €60–100)?	It depends: 2 Probably yes: 11 Probably no: 1	{"It depends":{"count":2},"Probably yes":{"count":11},"Probably no":{"count":1}}
HPI	SoSe 2020	Q3	DU10	If it was possible in Germany, would you get yourself genotyped with array technology if you had to pay for it yourself (around €60–100)?	Probably yes: 5 It depends: 2 Probably no: 3	{"Probably yes":{"count":5},"It depends":{"count":2},"Probably no":{"count":3}}
HPI	SoSe 2020	Q1	DU11	In the context of this course, we are only allowed to show you a fraction of your data. After the course, you can ask for a password to access your complete genomic data set. Are you planning to receive and analyze your complete data beyond the course?	Yes: 11 I don't know: 3 Only receive: 1	{"Yes":{"count":11},"I don't know":{"count":3},"Only receive":{"count":1}}
HPI	SoSe 2020	Q2	DU11	In the context of this course, we are only allowed to show you a fraction of your data. After the course, you can ask for a password to access your complete genomic data set. Are you planning to receive and analyze your complete data beyond the course?	Yes: 11 Only receive: 2 I prefer not to say: 1	{"Yes":{"count":11},"Only receive":{"count":2},"I prefer not to say":{"count":1}}
HPI	SoSe 2020	Q3	DU11	In the context of this course, we are only allowed to show you a fraction of your data. After the course, you can ask for a password to access your complete genomic data set. Are you planning to receive and analyze your complete data beyond the course?	Yes: 6 Only receive: 3 I don't know: 1	{"Yes":{"count":6},"Only receive":{"count":3},"I don't know":{"count":1}}
HPI	SoSe 2020	Q1	DU13	I feel adequately trained to analyze and interpret my personal genomic data beyond the course.	I don't know: 1 Definitely yes: 1 Definitely no: 4 Probably no: 5 I prefer not to say: 1 It depends: 2 Probably yes: 1	{"I don't know":{"count":1},"Definitely yes":{"count":1},"Definitely no":{"count":4},"Probably no":{"count":5},"I prefer not to say":{"count":1},"It depends":{"count":2},"Probably yes":{"count":1}}
HPI	SoSe 2020	Q2	DU13	I feel adequately trained to analyze and interpret my personal genomic data beyond the course.	It depends: 3 I don't know: 3 Definitely no: 3 Probably yes: 2 Probably no: 3	{"It depends":{"count":3},"I don't know":{"count":3},"Definitely no":{"count":3},"Probably yes":{"count":2},"Probably no":{"count":3}}
HPI	SoSe 2020	Q3	DU13	I feel adequately trained to analyze and interpret my personal genomic data beyond the course.	Probably yes: 6 Definitely no: 1 Probably no: 2 It depends: 1	{"Probably yes":{"count":6},"Definitely no":{"count":1},"Probably no":{"count":2},"It depends":{"count":1}}
HPI	SoSe 2020	Q2	DU14	Did you get yourself genotyped as part of this course?	Yes: 12 No: 1 I prefer not to say: 1	{"Yes":{"count":12},"No":{"count":1},"I prefer not to say":{"count":1}}
HPI	SoSe 2020	Q3	DU14	Did you get yourself genotyped as part of this course?	Yes: 10	{"Yes":{"count":10}}
HPI	SoSe 2020	Q2	DU15_04	Did you discuss whether or not to get yourself genotyped as part of this course with any of the following? Option: Genetic counselor	No: 13 Yes: 1	{"No":{"count":13},"Yes":{"count":1}}
HPI	SoSe 2020	Q3	DU15_04	Did you discuss whether or not to get yourself genotyped as part of this course with any of the following? Option: Genetic counselor	No: 10	{"No":{"count":10}}
HPI	SoSe 2020	Q2	DU15_05	Did you discuss whether or not to get yourself genotyped as part of this course with any of the following? Option: Physician or other health professional	No: 13 Yes: 1	{"No":{"count":13},"Yes":{"count":1}}
HPI	SoSe 2020	Q3	DU15_05	Did you discuss whether or not to get yourself genotyped as part of this course with any of the following? Option: Physician or other health professional	No: 10	{"No":{"count":10}}
HPI	SoSe 2020	Q2	DU15_06	Did you discuss whether or not to get yourself genotyped as part of this course with any of the following? Option: Parents	No: 8 Yes: 6	{"No":{"count":8},"Yes":{"count":6}}
HPI	SoSe 2020	Q3	DU15_06	Did you discuss whether or not to get yourself genotyped as part of this course with any of the following? Option: Parents	Yes: 4 No: 6	{"Yes":{"count":4},"No":{"count":6}}
HPI	SoSe 2020	Q2	DU15_07	Did you discuss whether or not to get yourself genotyped as part of this course with any of the following? Option: Sibling(s)	No: 13 Yes: 1	{"No":{"count":13},"Yes":{"count":1}}
HPI	SoSe 2020	Q3	DU15_07	Did you discuss whether or not to get yourself genotyped as part of this course with any of the following? Option: Sibling(s)	No: 8 Yes: 2	{"No":{"count":8},"Yes":{"count":2}}
HPI	SoSe 2020	Q2	DU15_08	Did you discuss whether or not to get yourself genotyped as part of this course with any of the following? Option: Other family members	No: 13 Yes: 1	{"No":{"count":13},"Yes":{"count":1}}
HPI	SoSe 2020	Q3	DU15_08	Did you discuss whether or not to get yourself genotyped as part of this course with any of the following? Option: Other family members	No: 9 Yes: 1	{"No":{"count":9},"Yes":{"count":1}}
HPI	SoSe 2020	Q2	DU15_09	Did you discuss whether or not to get yourself genotyped as part of this course with any of the following? Option: Friend(s)	No: 9 Yes: 5	{"No":{"count":9},"Yes":{"count":5}}
HPI	SoSe 2020	Q3	DU15_09	Did you discuss whether or not to get yourself genotyped as part of this course with any of the following? Option: Friend(s)	No: 5 Yes: 5	{"No":{"count":5},"Yes":{"count":5}}
HPI	SoSe 2020	Q2	DU15_10	Did you discuss whether or not to get yourself genotyped as part of this course with any of the following? Option: Spouse/significant other	No: 12 Yes: 2	{"No":{"count":12},"Yes":{"count":2}}
HPI	SoSe 2020	Q3	DU15_10	Did you discuss whether or not to get yourself genotyped as part of this course with any of the following? Option: Spouse/significant other	Yes: 4 No: 6	{"Yes":{"count":4},"No":{"count":6}}
HPI	SoSe 2020	Q2	DU15_11	Did you discuss whether or not to get yourself genotyped as part of this course with any of the following? Option: Course instructor(s)	No: 13 Yes: 1	{"No":{"count":13},"Yes":{"count":1}}
HPI	SoSe 2020	Q3	DU15_11	Did you discuss whether or not to get yourself genotyped as part of this course with any of the following? Option: Course instructor(s)	No: 10	{"No":{"count":10}}
HPI	SoSe 2020	Q2	DU15_01	Did you discuss whether or not to get yourself genotyped as part of this course with any of the following? Option: Other	Yes: 2 No: 12	{"Yes":{"count":2},"No":{"count":12}}
HPI	SoSe 2020	Q3	DU15_01	Did you discuss whether or not to get yourself genotyped as part of this course with any of the following? Option: Other	No: 9 Yes: 1	{"No":{"count":9},"Yes":{"count":1}}
HPI	SoSe 2020	Q2	DU15_02	Did you discuss whether or not to get yourself genotyped as part of this course with any of the following? Option: I prefer not to say (because	No: 14	{"No":{"count":14}}
HPI	SoSe 2020	Q3	DU15_02	Did you discuss whether or not to get yourself genotyped as part of this course with any of the following? Option: I prefer not to say (because	No: 10	{"No":{"count":10}}
HPI	SoSe 2020	Q2	DU16	Please reflect on the decision that you made about receiving or not receiving your genomic data as part of the course. Would you go for the same choice again?	Definitely yes: 9 Probably yes: 4 I don't know: 1	{"Definitely yes":{"count":9},"Probably yes":{"count":4},"I don't know":{"count":1}}
HPI	SoSe 2020	Q3	DU16	Please reflect on the decision that you made about receiving or not receiving your genomic data as part of the course. Would you go for the same choice again?	Definitely yes: 5 Probably yes: 5	{"Definitely yes":{"count":5},"Probably yes":{"count":5}}
HPI	SoSe 2020	Q2	DU17_01	Regarding your decision whether or not to get yourself genotyped, please indicate to what extend each of the statements below is true to you <u>at the present time</u>: Option: I feel adequately informed about the issues important to my decision	I strongly agree: 6 I agree: 8	{"I strongly agree":{"count":6},"I agree":{"count":8}}
HPI	SoSe 2020	Q3	DU17_01	Regarding your decision whether or not to get yourself genotyped, please indicate to what extend each of the statements below is true to you <u>at the present time</u>: Option: I feel adequately informed about the issues important to my decision	I strongly agree: 5 I agree: 4 Neutral: 1	{"I strongly agree":{"count":5},"I agree":{"count":4},"Neutral":{"count":1}}
HPI	SoSe 2020	Q2	DU17_02	Regarding your decision whether or not to get yourself genotyped, please indicate to what extend each of the statements below is true to you <u>at the present time</u>: Option: The decision I made was the best decision possible for me personally	I strongly agree: 5 I agree: 8 Neutral: 1	{"I strongly agree":{"count":5},"I agree":{"count":8},"Neutral":{"count":1}}
HPI	SoSe 2020	Q3	DU17_02	Regarding your decision whether or not to get yourself genotyped, please indicate to what extend each of the statements below is true to you <u>at the present time</u>: Option: The decision I made was the best decision possible for me personally	I strongly agree: 5 I agree: 4 Neutral: 1	{"I strongly agree":{"count":5},"I agree":{"count":4},"Neutral":{"count":1}}
HPI	SoSe 2020	Q2	DU17_03	Regarding your decision whether or not to get yourself genotyped, please indicate to what extend each of the statements below is true to you <u>at the present time</u>: Option: I am satisfied that this was my decision to make	I strongly agree: 6 I agree: 8	{"I strongly agree":{"count":6},"I agree":{"count":8}}
HPI	SoSe 2020	Q3	DU17_03	Regarding your decision whether or not to get yourself genotyped, please indicate to what extend each of the statements below is true to you <u>at the present time</u>: Option: I am satisfied that this was my decision to make	I strongly agree: 5 I agree: 5	{"I strongly agree":{"count":5},"I agree":{"count":5}}
HPI	SoSe 2020	Q2	DU17_04	Regarding your decision whether or not to get yourself genotyped, please indicate to what extend each of the statements below is true to you <u>at the present time</u>: Option: I am satisfied with my decision	I strongly agree: 7 I agree: 6 Not answered: 1	{"I strongly agree":{"count":7},"I agree":{"count":6},"Not answered":{"count":1}}
HPI	SoSe 2020	Q3	DU17_04	Regarding your decision whether or not to get yourself genotyped, please indicate to what extend each of the statements below is true to you <u>at the present time</u>: Option: I am satisfied with my decision	I strongly agree: 5 I agree: 5	{"I strongly agree":{"count":5},"I agree":{"count":5}}
HPI	SoSe 2020	Q2	DU17_05	Regarding your decision whether or not to get yourself genotyped, please indicate to what extend each of the statements below is true to you <u>at the present time</u>: Option: I am comfortable with my decision	I strongly agree: 6 I agree: 8	{"I strongly agree":{"count":6},"I agree":{"count":8}}
HPI	SoSe 2020	Q3	DU17_05	Regarding your decision whether or not to get yourself genotyped, please indicate to what extend each of the statements below is true to you <u>at the present time</u>: Option: I am comfortable with my decision	I strongly agree: 4 I agree: 6	{"I strongly agree":{"count":4},"I agree":{"count":6}}
HPI	SoSe 2020	Q3	DU18_04	Which of the analyses below did you conduct <u>with your own data</u>? Option: Perform variant annotation of my own data, i.e. database queries to find out the effect or function of a genetic variant	No: 6 Yes: 4	{"No":{"count":6},"Yes":{"count":4}}
HPI	SoSe 2020	Q3	DU18_05	Which of the analyses below did you conduct <u>with your own data</u>? Option: Assessing my personal disease risk using my own data	No: 10	{"No":{"count":10}}
HPI	SoSe 2020	Q3	DU18_06	Which of the analyses below did you conduct <u>with your own data</u>? Option: Calculate my genetic ancestry	No: 9 Yes: 1	{"No":{"count":9},"Yes":{"count":1}}
HPI	SoSe 2020	Q3	DU18_07	Which of the analyses below did you conduct <u>with your own data</u>? Option: Calculate genetic scores, e.g. for wellness traits like eye color or male pattern baldness, using my own data	Yes: 3 No: 7	{"Yes":{"count":3},"No":{"count":7}}
HPI	SoSe 2020	Q3	DU18_08	Which of the analyses below did you conduct <u>with your own data</u>? Option: Explore my pharmacogenomic markers, i.e. how my genes affect my response to drugs	Yes: 4 No: 6	{"Yes":{"count":4},"No":{"count":6}}
HPI	SoSe 2020	Q3	DU18_01	Which of the analyses below did you conduct <u>with your own data</u>? Option: Other	No: 5 Yes: 5	{"No":{"count":5},"Yes":{"count":5}}
HPI	SoSe 2020	Q3	DU18_02	Which of the analyses below did you conduct <u>with your own data</u>? Option: I prefer not to say (because	No: 9 Yes: 1	{"No":{"count":9},"Yes":{"count":1}}
HPI	SoSe 2020	Q1	DF02_02	Please express your opinion on the following statements: Option: I think the results from array genotyping are useful to physicians	I agree: 7 I strongly agree: 5 Neutral: 3	{"I agree":{"count":7},"I strongly agree":{"count":5},"Neutral":{"count":3}}
HPI	SoSe 2020	Q2	DF02_02	Please express your opinion on the following statements: Option: I think the results from array genotyping are useful to physicians	Neutral: 2 I agree: 10 I disagree: 1 I strongly agree: 1	{"Neutral":{"count":2},"I agree":{"count":10},"I disagree":{"count":1},"I strongly agree":{"count":1}}
HPI	SoSe 2020	Q3	DF02_02	Please express your opinion on the following statements: Option: I think the results from array genotyping are useful to physicians	I strongly agree: 1 I agree: 8 Neutral: 1	{"I strongly agree":{"count":1},"I agree":{"count":8},"Neutral":{"count":1}}
HPI	SoSe 2020	Q1	DF02_03	Please express your opinion on the following statements: Option: I think the results from array genotyping are useful to patients themselves	Neutral: 3 I strongly agree: 2 I agree: 7 I disagree: 1 I don't know: 1 I strongly disagree: 1	{"Neutral":{"count":3},"I strongly agree":{"count":2},"I agree":{"count":7},"I disagree":{"count":1},"I don't know":{"count":1},"I strongly disagree":{"count":1}}
HPI	SoSe 2020	Q2	DF02_03	Please express your opinion on the following statements: Option: I think the results from array genotyping are useful to patients themselves	Neutral: 6 I strongly agree: 2 I disagree: 1 I agree: 5	{"Neutral":{"count":6},"I strongly agree":{"count":2},"I disagree":{"count":1},"I agree":{"count":5}}
HPI	SoSe 2020	Q3	DF02_03	Please express your opinion on the following statements: Option: I think the results from array genotyping are useful to patients themselves	I agree: 4 Neutral: 4 I disagree: 2	{"I agree":{"count":4},"Neutral":{"count":4},"I disagree":{"count":2}}
HPI	SoSe 2020	Q1	DF02_04	Please express your opinion on the following statements: Option: I think the results from array genotyping lead to changes in patients' behavior	I disagree: 2 I agree: 7 I strongly agree: 2 I don't know: 4	{"I disagree":{"count":2},"I agree":{"count":7},"I strongly agree":{"count":2},"I don't know":{"count":4}}
HPI	SoSe 2020	Q2	DF02_04	Please express your opinion on the following statements: Option: I think the results from array genotyping lead to changes in patients' behavior	Neutral: 6 I agree: 8	{"Neutral":{"count":6},"I agree":{"count":8}}
HPI	SoSe 2020	Q3	DF02_04	Please express your opinion on the following statements: Option: I think the results from array genotyping lead to changes in patients' behavior	I agree: 3 Neutral: 5 I disagree: 2	{"I agree":{"count":3},"Neutral":{"count":5},"I disagree":{"count":2}}
HPI	SoSe 2020	Q1	DF02_01	Please express your opinion on the following statements: Option: I think analyzing my own genomic data as part of the AYPG course is useful	I strongly agree: 7 I agree: 7 Neutral: 1	{"I strongly agree":{"count":7},"I agree":{"count":7},"Neutral":{"count":1}}
HPI	SoSe 2020	Q2	DF02_01	Please express your opinion on the following statements: Option: I think analyzing my own genomic data as part of the AYPG course is useful	I strongly agree: 7 I agree: 6 I prefer not to say: 1	{"I strongly agree":{"count":7},"I agree":{"count":6},"I prefer not to say":{"count":1}}
HPI	SoSe 2020	Q3	DF02_01	Please express your opinion on the following statements: Option: I think analyzing my own genomic data as part of the AYPG course is useful	I agree: 5 I strongly agree: 3 Neutral: 2	{"I agree":{"count":5},"I strongly agree":{"count":3},"Neutral":{"count":2}}
HPI	SoSe 2020	Q1	DF02_05	Please express your opinion on the following statements: Option: I think the results from array genotyping will lead to changes in my personal behavior	I disagree: 4 I agree: 5 Neutral: 2 I don't know: 2 I strongly disagree: 1 I strongly agree: 1	{"I disagree":{"count":4},"I agree":{"count":5},"Neutral":{"count":2},"I don't know":{"count":2},"I strongly disagree":{"count":1},"I strongly agree":{"count":1}}
HPI	SoSe 2020	Q2	DF02_05	Please express your opinion on the following statements: Option: I think the results from array genotyping will lead to changes in my personal behavior	I strongly disagree: 1 Neutral: 3 I agree: 7 I disagree: 1 I strongly agree: 1 I prefer not to say: 1	{"I strongly disagree":{"count":1},"Neutral":{"count":3},"I agree":{"count":7},"I disagree":{"count":1},"I strongly agree":{"count":1},"I prefer not to say":{"count":1}}
HPI	SoSe 2020	Q3	DF02_05	Please express your opinion on the following statements: Option: I think the results from array genotyping will lead to changes in my personal behavior	Neutral: 4 I disagree: 4 I agree: 2	{"Neutral":{"count":4},"I disagree":{"count":4},"I agree":{"count":2}}
HPI	SoSe 2020	Q1	DF02_06	Please express your opinion on the following statements: Option: I think the results from array genotyping will lead to changes in my future health care decisions	I disagree: 1 I agree: 6 I strongly agree: 3 Neutral: 5	{"I disagree":{"count":1},"I agree":{"count":6},"I strongly agree":{"count":3},"Neutral":{"count":5}}
HPI	SoSe 2020	Q2	DF02_06	Please express your opinion on the following statements: Option: I think the results from array genotyping will lead to changes in my future health care decisions	Neutral: 3 I agree: 8 I disagree: 1 I strongly agree: 1 I prefer not to say: 1	{"Neutral":{"count":3},"I agree":{"count":8},"I disagree":{"count":1},"I strongly agree":{"count":1},"I prefer not to say":{"count":1}}
HPI	SoSe 2020	Q3	DF02_06	Please express your opinion on the following statements: Option: I think the results from array genotyping will lead to changes in my future health care decisions	Neutral: 3 I agree: 5 I disagree: 2	{"Neutral":{"count":3},"I agree":{"count":5},"I disagree":{"count":2}}
HPI	SoSe 2020	Q1	RS02_01	The German Genetic Diagnostics Act (Gendiagnostikgesetz, GenDG) states the following regulations: <ul> <li> Since 1 February 2010, anyone applying for human genetic analyses is obliged to comply with the new GenDG. The law regulates genetic testing for medical purposes, for determining parentage, for insurance purposes, and in the workplace. </li> <li> All genetic analyses must be accompanied by …	I agree: 10 Neutral: 5	{"I agree":{"count":10},"Neutral":{"count":5}}
HPI	SoSe 2020	Q2	RS02_01	The German Genetic Diagnostics Act (Gendiagnostikgesetz, GenDG) states the following regulations: <ul> <li> Since 1 February 2010, anyone applying for human genetic analyses is obliged to comply with the new GenDG. The law regulates genetic testing for medical purposes, for determining parentage, for insurance purposes, and in the workplace. </li> <li> All genetic analyses must be accompanied by …	I agree: 8 Neutral: 2 I strongly agree: 3 Not answered: 1	{"I agree":{"count":8},"Neutral":{"count":2},"I strongly agree":{"count":3},"Not answered":{"count":1}}
HPI	SoSe 2020	Q3	RS02_01	The German Genetic Diagnostics Act (Gendiagnostikgesetz, GenDG) states the following regulations: <ul> <li> Since 1 February 2010, anyone applying for human genetic analyses is obliged to comply with the new GenDG. The law regulates genetic testing for medical purposes, for determining parentage, for insurance purposes, and in the workplace. </li> <li> All genetic analyses must be accompanied by …	Neutral: 3 I agree: 6 I strongly agree: 1	{"Neutral":{"count":3},"I agree":{"count":6},"I strongly agree":{"count":1}}
HPI	SoSe 2020	Q1	RS02_02	The German Genetic Diagnostics Act (Gendiagnostikgesetz, GenDG) states the following regulations: <ul> <li> Since 1 February 2010, anyone applying for human genetic analyses is obliged to comply with the new GenDG. The law regulates genetic testing for medical purposes, for determining parentage, for insurance purposes, and in the workplace. </li> <li> All genetic analyses must be accompanied by …	I strongly agree: 4 I agree: 6 Neutral: 4 I disagree: 1	{"I strongly agree":{"count":4},"I agree":{"count":6},"Neutral":{"count":4},"I disagree":{"count":1}}
HPI	SoSe 2020	Q2	RS02_02	The German Genetic Diagnostics Act (Gendiagnostikgesetz, GenDG) states the following regulations: <ul> <li> Since 1 February 2010, anyone applying for human genetic analyses is obliged to comply with the new GenDG. The law regulates genetic testing for medical purposes, for determining parentage, for insurance purposes, and in the workplace. </li> <li> All genetic analyses must be accompanied by …	I agree: 6 Neutral: 4 I strongly agree: 4	{"I agree":{"count":6},"Neutral":{"count":4},"I strongly agree":{"count":4}}
HPI	SoSe 2020	Q3	RS02_02	The German Genetic Diagnostics Act (Gendiagnostikgesetz, GenDG) states the following regulations: <ul> <li> Since 1 February 2010, anyone applying for human genetic analyses is obliged to comply with the new GenDG. The law regulates genetic testing for medical purposes, for determining parentage, for insurance purposes, and in the workplace. </li> <li> All genetic analyses must be accompanied by …	I strongly agree: 2 I agree: 6 I disagree: 1 Neutral: 1	{"I strongly agree":{"count":2},"I agree":{"count":6},"I disagree":{"count":1},"Neutral":{"count":1}}
HPI	SoSe 2020	Q1	RS02_03	The German Genetic Diagnostics Act (Gendiagnostikgesetz, GenDG) states the following regulations: <ul> <li> Since 1 February 2010, anyone applying for human genetic analyses is obliged to comply with the new GenDG. The law regulates genetic testing for medical purposes, for determining parentage, for insurance purposes, and in the workplace. </li> <li> All genetic analyses must be accompanied by …	I agree: 1 I disagree: 7 Neutral: 6 I don't know: 1	{"I agree":{"count":1},"I disagree":{"count":7},"Neutral":{"count":6},"I don't know":{"count":1}}
HPI	SoSe 2020	Q2	RS02_03	The German Genetic Diagnostics Act (Gendiagnostikgesetz, GenDG) states the following regulations: <ul> <li> Since 1 February 2010, anyone applying for human genetic analyses is obliged to comply with the new GenDG. The law regulates genetic testing for medical purposes, for determining parentage, for insurance purposes, and in the workplace. </li> <li> All genetic analyses must be accompanied by …	Neutral: 6 I disagree: 4 I strongly disagree: 2 I agree: 2	{"Neutral":{"count":6},"I disagree":{"count":4},"I strongly disagree":{"count":2},"I agree":{"count":2}}
HPI	SoSe 2020	Q3	RS02_03	The German Genetic Diagnostics Act (Gendiagnostikgesetz, GenDG) states the following regulations: <ul> <li> Since 1 February 2010, anyone applying for human genetic analyses is obliged to comply with the new GenDG. The law regulates genetic testing for medical purposes, for determining parentage, for insurance purposes, and in the workplace. </li> <li> All genetic analyses must be accompanied by …	I disagree: 7 I strongly disagree: 2 Neutral: 1	{"I disagree":{"count":7},"I strongly disagree":{"count":2},"Neutral":{"count":1}}
HPI	SoSe 2020	Q1	RS02_04	The German Genetic Diagnostics Act (Gendiagnostikgesetz, GenDG) states the following regulations: <ul> <li> Since 1 February 2010, anyone applying for human genetic analyses is obliged to comply with the new GenDG. The law regulates genetic testing for medical purposes, for determining parentage, for insurance purposes, and in the workplace. </li> <li> All genetic analyses must be accompanied by …	I agree: 10 I strongly agree: 5	{"I agree":{"count":10},"I strongly agree":{"count":5}}
HPI	SoSe 2020	Q2	RS02_04	The German Genetic Diagnostics Act (Gendiagnostikgesetz, GenDG) states the following regulations: <ul> <li> Since 1 February 2010, anyone applying for human genetic analyses is obliged to comply with the new GenDG. The law regulates genetic testing for medical purposes, for determining parentage, for insurance purposes, and in the workplace. </li> <li> All genetic analyses must be accompanied by …	I agree: 9 I strongly agree: 4 Neutral: 1	{"I agree":{"count":9},"I strongly agree":{"count":4},"Neutral":{"count":1}}
HPI	SoSe 2020	Q3	RS02_04	The German Genetic Diagnostics Act (Gendiagnostikgesetz, GenDG) states the following regulations: <ul> <li> Since 1 February 2010, anyone applying for human genetic analyses is obliged to comply with the new GenDG. The law regulates genetic testing for medical purposes, for determining parentage, for insurance purposes, and in the workplace. </li> <li> All genetic analyses must be accompanied by …	I agree: 7 I strongly agree: 3	{"I agree":{"count":7},"I strongly agree":{"count":3}}
HPI	SoSe 2020	Q1	RS02_05	The German Genetic Diagnostics Act (Gendiagnostikgesetz, GenDG) states the following regulations: <ul> <li> Since 1 February 2010, anyone applying for human genetic analyses is obliged to comply with the new GenDG. The law regulates genetic testing for medical purposes, for determining parentage, for insurance purposes, and in the workplace. </li> <li> All genetic analyses must be accompanied by …	I strongly agree: 7 I agree: 4 Neutral: 3 I don't know: 1	{"I strongly agree":{"count":7},"I agree":{"count":4},"Neutral":{"count":3},"I don't know":{"count":1}}
HPI	SoSe 2020	Q2	RS02_05	The German Genetic Diagnostics Act (Gendiagnostikgesetz, GenDG) states the following regulations: <ul> <li> Since 1 February 2010, anyone applying for human genetic analyses is obliged to comply with the new GenDG. The law regulates genetic testing for medical purposes, for determining parentage, for insurance purposes, and in the workplace. </li> <li> All genetic analyses must be accompanied by …	I strongly agree: 7 Neutral: 3 I agree: 3 I prefer not to say: 1	{"I strongly agree":{"count":7},"Neutral":{"count":3},"I agree":{"count":3},"I prefer not to say":{"count":1}}
HPI	SoSe 2020	Q3	RS02_05	The German Genetic Diagnostics Act (Gendiagnostikgesetz, GenDG) states the following regulations: <ul> <li> Since 1 February 2010, anyone applying for human genetic analyses is obliged to comply with the new GenDG. The law regulates genetic testing for medical purposes, for determining parentage, for insurance purposes, and in the workplace. </li> <li> All genetic analyses must be accompanied by …	I disagree: 3 I strongly agree: 1 I agree: 2 Neutral: 3 I don't know: 1	{"I disagree":{"count":3},"I strongly agree":{"count":1},"I agree":{"count":2},"Neutral":{"count":3},"I don't know":{"count":1}}
HPI	SoSe 2020	Q1	RS02_06	The German Genetic Diagnostics Act (Gendiagnostikgesetz, GenDG) states the following regulations: <ul> <li> Since 1 February 2010, anyone applying for human genetic analyses is obliged to comply with the new GenDG. The law regulates genetic testing for medical purposes, for determining parentage, for insurance purposes, and in the workplace. </li> <li> All genetic analyses must be accompanied by …	I strongly disagree: 3 I agree: 3 Neutral: 4 Not answered: 1 I disagree: 2 I strongly agree: 1 I don't know: 1	{"I strongly disagree":{"count":3},"I agree":{"count":3},"Neutral":{"count":4},"Not answered":{"count":1},"I disagree":{"count":2},"I strongly agree":{"count":1},"I don't know":{"count":1}}
HPI	SoSe 2020	Q2	RS02_06	The German Genetic Diagnostics Act (Gendiagnostikgesetz, GenDG) states the following regulations: <ul> <li> Since 1 February 2010, anyone applying for human genetic analyses is obliged to comply with the new GenDG. The law regulates genetic testing for medical purposes, for determining parentage, for insurance purposes, and in the workplace. </li> <li> All genetic analyses must be accompanied by …	I strongly disagree: 2 I agree: 3 Neutral: 4 I disagree: 4 I prefer not to say: 1	{"I strongly disagree":{"count":2},"I agree":{"count":3},"Neutral":{"count":4},"I disagree":{"count":4},"I prefer not to say":{"count":1}}
HPI	SoSe 2020	Q3	RS02_06	The German Genetic Diagnostics Act (Gendiagnostikgesetz, GenDG) states the following regulations: <ul> <li> Since 1 February 2010, anyone applying for human genetic analyses is obliged to comply with the new GenDG. The law regulates genetic testing for medical purposes, for determining parentage, for insurance purposes, and in the workplace. </li> <li> All genetic analyses must be accompanied by …	I strongly agree: 1 I strongly disagree: 1 I disagree: 1 I agree: 5 Neutral: 2	{"I strongly agree":{"count":1},"I strongly disagree":{"count":1},"I disagree":{"count":1},"I agree":{"count":5},"Neutral":{"count":2}}
HPI	SoSe 2020	Q1	RS02_07	The German Genetic Diagnostics Act (Gendiagnostikgesetz, GenDG) states the following regulations: <ul> <li> Since 1 February 2010, anyone applying for human genetic analyses is obliged to comply with the new GenDG. The law regulates genetic testing for medical purposes, for determining parentage, for insurance purposes, and in the workplace. </li> <li> All genetic analyses must be accompanied by …	I strongly disagree: 3 I don't know: 2 I disagree: 5 I agree: 2 Neutral: 2 I strongly agree: 1	{"I strongly disagree":{"count":3},"I don't know":{"count":2},"I disagree":{"count":5},"I agree":{"count":2},"Neutral":{"count":2},"I strongly agree":{"count":1}}
HPI	SoSe 2020	Q2	RS02_07	The German Genetic Diagnostics Act (Gendiagnostikgesetz, GenDG) states the following regulations: <ul> <li> Since 1 February 2010, anyone applying for human genetic analyses is obliged to comply with the new GenDG. The law regulates genetic testing for medical purposes, for determining parentage, for insurance purposes, and in the workplace. </li> <li> All genetic analyses must be accompanied by …	I strongly disagree: 3 I agree: 3 Neutral: 2 I disagree: 4 I prefer not to say: 1 I strongly agree: 1	{"I strongly disagree":{"count":3},"I agree":{"count":3},"Neutral":{"count":2},"I disagree":{"count":4},"I prefer not to say":{"count":1},"I strongly agree":{"count":1}}
HPI	SoSe 2020	Q3	RS02_07	The German Genetic Diagnostics Act (Gendiagnostikgesetz, GenDG) states the following regulations: <ul> <li> Since 1 February 2010, anyone applying for human genetic analyses is obliged to comply with the new GenDG. The law regulates genetic testing for medical purposes, for determining parentage, for insurance purposes, and in the workplace. </li> <li> All genetic analyses must be accompanied by …	I strongly disagree: 2 I disagree: 3 I agree: 3 Neutral: 2	{"I strongly disagree":{"count":2},"I disagree":{"count":3},"I agree":{"count":3},"Neutral":{"count":2}}
HPI	SoSe 2020	Q1	WG02_01	What is your opinion regarding whole genome sequencing (WGS)? Option: I think WGS results are more accurate than results from array data	I don't know: 5 I don't understand: 1 Neutral: 4 I agree: 4 I strongly disagree: 1	{"I don't know":{"count":5},"I don't understand":{"count":1},"Neutral":{"count":4},"I agree":{"count":4},"I strongly disagree":{"count":1}}
HPI	SoSe 2020	Q2	WG02_01	What is your opinion regarding whole genome sequencing (WGS)? Option: I think WGS results are more accurate than results from array data	I agree: 4 Neutral: 3 I strongly agree: 3 I disagree: 2 I don't know: 1 I strongly disagree: 1	{"I agree":{"count":4},"Neutral":{"count":3},"I strongly agree":{"count":3},"I disagree":{"count":2},"I don't know":{"count":1},"I strongly disagree":{"count":1}}
HPI	SoSe 2020	Q3	WG02_01	What is your opinion regarding whole genome sequencing (WGS)? Option: I think WGS results are more accurate than results from array data	I agree: 4 Neutral: 3 I strongly agree: 2 I strongly disagree: 1	{"I agree":{"count":4},"Neutral":{"count":3},"I strongly agree":{"count":2},"I strongly disagree":{"count":1}}
HPI	SoSe 2020	Q1	WG02_02	What is your opinion regarding whole genome sequencing (WGS)? Option: I think WGS results are more predictive than results from array data	I don't know: 6 I don't understand: 1 I agree: 4 Neutral: 2 I strongly agree: 1 I strongly disagree: 1	{"I don't know":{"count":6},"I don't understand":{"count":1},"I agree":{"count":4},"Neutral":{"count":2},"I strongly agree":{"count":1},"I strongly disagree":{"count":1}}
HPI	SoSe 2020	Q2	WG02_02	What is your opinion regarding whole genome sequencing (WGS)? Option: I think WGS results are more predictive than results from array data	Neutral: 2 I agree: 6 I strongly agree: 4 I don't know: 1 I strongly disagree: 1	{"Neutral":{"count":2},"I agree":{"count":6},"I strongly agree":{"count":4},"I don't know":{"count":1},"I strongly disagree":{"count":1}}
HPI	SoSe 2020	Q3	WG02_02	What is your opinion regarding whole genome sequencing (WGS)? Option: I think WGS results are more predictive than results from array data	I strongly agree: 3 Neutral: 3 I agree: 2 I disagree: 1 I strongly disagree: 1	{"I strongly agree":{"count":3},"Neutral":{"count":3},"I agree":{"count":2},"I disagree":{"count":1},"I strongly disagree":{"count":1}}
HPI	SoSe 2020	Q1	WG02_03	What is your opinion regarding whole genome sequencing (WGS)? Option: I would prefer WGS technology over array technology for genotyping my own data	I don't know: 5 I don't understand: 1 I agree: 5 Neutral: 1 I strongly agree: 2 I strongly disagree: 1	{"I don't know":{"count":5},"I don't understand":{"count":1},"I agree":{"count":5},"Neutral":{"count":1},"I strongly agree":{"count":2},"I strongly disagree":{"count":1}}
HPI	SoSe 2020	Q2	WG02_03	What is your opinion regarding whole genome sequencing (WGS)? Option: I would prefer WGS technology over array technology for genotyping my own data	I agree: 6 Neutral: 2 I strongly agree: 3 I don't know: 1 I disagree: 1 I strongly disagree: 1	{"I agree":{"count":6},"Neutral":{"count":2},"I strongly agree":{"count":3},"I don't know":{"count":1},"I disagree":{"count":1},"I strongly disagree":{"count":1}}
HPI	SoSe 2020	Q3	WG02_03	What is your opinion regarding whole genome sequencing (WGS)? Option: I would prefer WGS technology over array technology for genotyping my own data	I agree: 4 Neutral: 2 I strongly agree: 3 I disagree: 1	{"I agree":{"count":4},"Neutral":{"count":2},"I strongly agree":{"count":3},"I disagree":{"count":1}}
HPI	SoSe 2020	Q1	WG02_04	What is your opinion regarding whole genome sequencing (WGS)? Option: I think WGS results are connected with more risks than results from array data	Neutral: 3 I don't understand: 1 I disagree: 4 I don't know: 4 I agree: 2 I strongly disagree: 1	{"Neutral":{"count":3},"I don't understand":{"count":1},"I disagree":{"count":4},"I don't know":{"count":4},"I agree":{"count":2},"I strongly disagree":{"count":1}}
HPI	SoSe 2020	Q2	WG02_04	What is your opinion regarding whole genome sequencing (WGS)? Option: I think WGS results are connected with more risks than results from array data	I agree: 2 Neutral: 6 I don't know: 2 I strongly disagree: 2 I disagree: 1 I strongly agree: 1	{"I agree":{"count":2},"Neutral":{"count":6},"I don't know":{"count":2},"I strongly disagree":{"count":2},"I disagree":{"count":1},"I strongly agree":{"count":1}}
HPI	SoSe 2020	Q3	WG02_04	What is your opinion regarding whole genome sequencing (WGS)? Option: I think WGS results are connected with more risks than results from array data	I disagree: 2 I agree: 5 Neutral: 1 I strongly disagree: 2	{"I disagree":{"count":2},"I agree":{"count":5},"Neutral":{"count":1},"I strongly disagree":{"count":2}}
HPI	SoSe 2020	Q1	WG02_05	What is your opinion regarding whole genome sequencing (WGS)? Option: I am more concerned about privacy issues when using WGS technology, compared to using array technology	I disagree: 2 I don't understand: 1 I strongly disagree: 5 I don't know: 3 I strongly agree: 1 I agree: 2 Neutral: 1	{"I disagree":{"count":2},"I don't understand":{"count":1},"I strongly disagree":{"count":5},"I don't know":{"count":3},"I strongly agree":{"count":1},"I agree":{"count":2},"Neutral":{"count":1}}
HPI	SoSe 2020	Q2	WG02_05	What is your opinion regarding whole genome sequencing (WGS)? Option: I am more concerned about privacy issues when using WGS technology, compared to using array technology	Neutral: 3 I agree: 5 I strongly agree: 1 I strongly disagree: 3 I disagree: 1 I don't know: 1	{"Neutral":{"count":3},"I agree":{"count":5},"I strongly agree":{"count":1},"I strongly disagree":{"count":3},"I disagree":{"count":1},"I don't know":{"count":1}}
HPI	SoSe 2020	Q3	WG02_05	What is your opinion regarding whole genome sequencing (WGS)? Option: I am more concerned about privacy issues when using WGS technology, compared to using array technology	I agree: 4 I strongly disagree: 2 I disagree: 2 Neutral: 1 I strongly agree: 1	{"I agree":{"count":4},"I strongly disagree":{"count":2},"I disagree":{"count":2},"Neutral":{"count":1},"I strongly agree":{"count":1}}
HPI	SoSe 2020	Q1	WG02_06	What is your opinion regarding whole genome sequencing (WGS)? Option: I think the results from WGS are more useful to a physician than results from array data	Neutral: 3 I don't understand: 1 I disagree: 2 I agree: 3 I don't know: 4 I strongly disagree: 1 I strongly agree: 1	{"Neutral":{"count":3},"I don't understand":{"count":1},"I disagree":{"count":2},"I agree":{"count":3},"I don't know":{"count":4},"I strongly disagree":{"count":1},"I strongly agree":{"count":1}}
HPI	SoSe 2020	Q2	WG02_06	What is your opinion regarding whole genome sequencing (WGS)? Option: I think the results from WGS are more useful to a physician than results from array data	Neutral: 5 I agree: 3 I strongly agree: 3 I don't know: 1 I disagree: 1 I strongly disagree: 1	{"Neutral":{"count":5},"I agree":{"count":3},"I strongly agree":{"count":3},"I don't know":{"count":1},"I disagree":{"count":1},"I strongly disagree":{"count":1}}
HPI	SoSe 2020	Q3	WG02_06	What is your opinion regarding whole genome sequencing (WGS)? Option: I think the results from WGS are more useful to a physician than results from array data	I strongly agree: 1 Neutral: 6 I agree: 2 I strongly disagree: 1	{"I strongly agree":{"count":1},"Neutral":{"count":6},"I agree":{"count":2},"I strongly disagree":{"count":1}}
HPI	SoSe 2020	Q1	WG02_07	What is your opinion regarding whole genome sequencing (WGS)? Option: I think the results from WGS are more useful to patients themselves than results from array data	Neutral: 3 I don't understand: 1 I disagree: 4 I don't know: 4 I agree: 2 I strongly disagree: 1	{"Neutral":{"count":3},"I don't understand":{"count":1},"I disagree":{"count":4},"I don't know":{"count":4},"I agree":{"count":2},"I strongly disagree":{"count":1}}
HPI	SoSe 2020	Q2	WG02_07	What is your opinion regarding whole genome sequencing (WGS)? Option: I think the results from WGS are more useful to patients themselves than results from array data	Neutral: 6 I agree: 3 I strongly agree: 1 I don't know: 1 I disagree: 2 I strongly disagree: 1	{"Neutral":{"count":6},"I agree":{"count":3},"I strongly agree":{"count":1},"I don't know":{"count":1},"I disagree":{"count":2},"I strongly disagree":{"count":1}}
HPI	SoSe 2020	Q3	WG02_07	What is your opinion regarding whole genome sequencing (WGS)? Option: I think the results from WGS are more useful to patients themselves than results from array data	I agree: 2 Neutral: 5 I disagree: 2 I strongly disagree: 1	{"I agree":{"count":2},"Neutral":{"count":5},"I disagree":{"count":2},"I strongly disagree":{"count":1}}
HPI	SoSe 2020	Q1	WG02_08	What is your opinion regarding whole genome sequencing (WGS)? Option: I think the results from WGS would more likely lead to changes in patients' behavior than results from array data	Neutral: 3 I don't understand: 1 I disagree: 3 I don't know: 5 I agree: 1 I strongly disagree: 1 I strongly agree: 1	{"Neutral":{"count":3},"I don't understand":{"count":1},"I disagree":{"count":3},"I don't know":{"count":5},"I agree":{"count":1},"I strongly disagree":{"count":1},"I strongly agree":{"count":1}}
HPI	SoSe 2020	Q2	WG02_08	What is your opinion regarding whole genome sequencing (WGS)? Option: I think the results from WGS would more likely lead to changes in patients' behavior than results from array data	Neutral: 5 I disagree: 4 I don't know: 2 I agree: 1 I strongly disagree: 1 I strongly agree: 1	{"Neutral":{"count":5},"I disagree":{"count":4},"I don't know":{"count":2},"I agree":{"count":1},"I strongly disagree":{"count":1},"I strongly agree":{"count":1}}
HPI	SoSe 2020	Q3	WG02_08	What is your opinion regarding whole genome sequencing (WGS)? Option: I think the results from WGS would more likely lead to changes in patients' behavior than results from array data	Neutral: 3 I disagree: 4 I agree: 2 I strongly disagree: 1	{"Neutral":{"count":3},"I disagree":{"count":4},"I agree":{"count":2},"I strongly disagree":{"count":1}}
HPI	SoSe 2020	Q1	WG02_09	What is your opinion regarding whole genome sequencing (WGS)? Option: I think the results from WGS would more likely lead to changes in my personal behavior than results from array data	I disagree: 2 I don't understand: 1 Neutral: 2 I don't know: 3 I agree: 4 I strongly disagree: 2 I strongly agree: 1	{"I disagree":{"count":2},"I don't understand":{"count":1},"Neutral":{"count":2},"I don't know":{"count":3},"I agree":{"count":4},"I strongly disagree":{"count":2},"I strongly agree":{"count":1}}
HPI	SoSe 2020	Q2	WG02_09	What is your opinion regarding whole genome sequencing (WGS)? Option: I think the results from WGS would more likely lead to changes in my personal behavior than results from array data	I strongly disagree: 2 I disagree: 4 Neutral: 4 I don't know: 2 I agree: 2	{"I strongly disagree":{"count":2},"I disagree":{"count":4},"Neutral":{"count":4},"I don't know":{"count":2},"I agree":{"count":2}}
HPI	SoSe 2020	Q3	WG02_09	What is your opinion regarding whole genome sequencing (WGS)? Option: I think the results from WGS would more likely lead to changes in my personal behavior than results from array data	Neutral: 5 I disagree: 3 I agree: 1 I strongly disagree: 1	{"Neutral":{"count":5},"I disagree":{"count":3},"I agree":{"count":1},"I strongly disagree":{"count":1}}
HPI	SoSe 2020	Q1	WG02_10	What is your opinion regarding whole genome sequencing (WGS)? Option: I think the results from WGS would more likely lead to changes in my future health care decisions than results from array data	I disagree: 2 I don't understand: 1 Neutral: 2 I agree: 4 I don't know: 4 I strongly disagree: 1 I strongly agree: 1	{"I disagree":{"count":2},"I don't understand":{"count":1},"Neutral":{"count":2},"I agree":{"count":4},"I don't know":{"count":4},"I strongly disagree":{"count":1},"I strongly agree":{"count":1}}
HPI	SoSe 2020	Q2	WG02_10	What is your opinion regarding whole genome sequencing (WGS)? Option: I think the results from WGS would more likely lead to changes in my future health care decisions than results from array data	Neutral: 6 I strongly agree: 2 I don't know: 2 I agree: 1 I disagree: 2 I strongly disagree: 1	{"Neutral":{"count":6},"I strongly agree":{"count":2},"I don't know":{"count":2},"I agree":{"count":1},"I disagree":{"count":2},"I strongly disagree":{"count":1}}
HPI	SoSe 2020	Q3	WG02_10	What is your opinion regarding whole genome sequencing (WGS)? Option: I think the results from WGS would more likely lead to changes in my future health care decisions than results from array data	Neutral: 5 I agree: 2 I disagree: 2 I strongly disagree: 1	{"Neutral":{"count":5},"I agree":{"count":2},"I disagree":{"count":2},"I strongly disagree":{"count":1}}
HPI	SoSe 2020	Q1	WG05	Did you get your genome sequenced with WGS outside of this course?	No: 15	{"No":{"count":15}}
HPI	SoSe 2020	Q2	WG05	Did you get your genome sequenced with WGS outside of this course?	No: 13 Yes: 1	{"No":{"count":13},"Yes":{"count":1}}
HPI	SoSe 2020	Q3	WG05	Did you get your genome sequenced with WGS outside of this course?	No: 10	{"No":{"count":10}}
HPI	SoSe 2020	Q1	WG03	If it was possible in Germany, would you get yourself genotyped with WGS at no charge?	Probably yes: 5 Definitely yes: 7 I don't know: 1 It depends: 1 Probably no: 1	{"Probably yes":{"count":5},"Definitely yes":{"count":7},"I don't know":{"count":1},"It depends":{"count":1},"Probably no":{"count":1}}
HPI	SoSe 2020	Q2	WG03	If it was possible in Germany, would you get yourself genotyped with WGS at no charge?	Definitely yes: 5 Probably yes: 5 It depends: 2 I don't know: 2	{"Definitely yes":{"count":5},"Probably yes":{"count":5},"It depends":{"count":2},"I don't know":{"count":2}}
HPI	SoSe 2020	Q3	WG03	If it was possible in Germany, would you get yourself genotyped with WGS at no charge?	Probably yes: 5 Definitely yes: 2 Probably no: 2 It depends: 1	{"Probably yes":{"count":5},"Definitely yes":{"count":2},"Probably no":{"count":2},"It depends":{"count":1}}
HPI	SoSe 2020	Q1	WG04	If it was possible in Germany, would you get yourself genotyped with WGS if you had to pay for it yourself (around €600–1000)?	Probably no: 6 Probably yes: 2 It depends: 4 Definitely no: 3	{"Probably no":{"count":6},"Probably yes":{"count":2},"It depends":{"count":4},"Definitely no":{"count":3}}
HPI	SoSe 2020	Q2	WG04	If it was possible in Germany, would you get yourself genotyped with WGS if you had to pay for it yourself (around €600–1000)?	It depends: 4 Probably no: 3 Definitely no: 3 Probably yes: 2 I don't know: 2	{"It depends":{"count":4},"Probably no":{"count":3},"Definitely no":{"count":3},"Probably yes":{"count":2},"I don't know":{"count":2}}
HPI	SoSe 2020	Q3	WG04	If it was possible in Germany, would you get yourself genotyped with WGS if you had to pay for it yourself (around €600–1000)?	It depends: 2 Definitely no: 2 Probably no: 6	{"It depends":{"count":2},"Definitely no":{"count":2},"Probably no":{"count":6}}
TUM	Before WiSe 2020/21	Q4'	T201	When did you participate in the course?	WiSe 2017/18: 12 SoSe 2018: 15 SoSe 2017: 5 WiSe 2019/20: 9 WiSe 2018/19: 6	{"WiSe 2017/18":{"count":12},"SoSe 2018":{"count":15},"SoSe 2017":{"count":5},"WiSe 2019/20":{"count":9},"WiSe 2018/19":{"count":6}}
TUM	Before WiSe 2020/21	Q4'	T203	Did you conduct any analyses with your data beyond the course?	No: 19 Question not asked: 18 Yes: 10	{"No":{"count":19},"Question not asked":{"count":18},"Yes":{"count":10}}
TUM	Before WiSe 2020/21	Q4'	T207	What did you study or which education did you have when you participated in the course?	Medicine: 36 Other educational background: 7 Genetic and Genomic Counseling: 4	{"Medicine":{"count":36},"Other educational background":{"count":7},"Genetic and Genomic Counseling":{"count":4}}
TUM	WiSe 2020/21	Q3	Q302	Have you collected the password for your complete genomic data after the course or do you still plan to do it?​	Yes: 7	{"Yes":{"count":7}}
HPI	SoSe 2020	Q4	QX02		I want to participate in the study: 10	{"I want to participate in the study":{"count":10}}
HPI	SoSe 2021	Q1	QX02		I want to participate in the study: 16	{"I want to participate in the study":{"count":16}}
HPI	SoSe 2021	Q2	QX02		I want to participate in the study: 15	{"I want to participate in the study":{"count":15}}
HPI	SoSe 2021	Q3	QX02		I want to participate in the study: 9	{"I want to participate in the study":{"count":9}}
HPI	SoSe 2021	Q4	QX02		I want to participate in the study: 9	{"I want to participate in the study":{"count":9}}
TUM	Before WiSe 2020/21	Q4'	QX02		I want to participate in the study: 47	{"I want to participate in the study":{"count":47}}
TUM	WiSe 2020/21	Q1	QX02		I want to participate in the study: 8	{"I want to participate in the study":{"count":8}}
TUM	WiSe 2020/21	Q2	QX02		I want to participate in the study: 8	{"I want to participate in the study":{"count":8}}
TUM	WiSe 2020/21	Q3	QX02		I want to participate in the study: 7	{"I want to participate in the study":{"count":7}}
TUM	WiSe 2020/21	Q4	QX02		I want to participate in the study: 6	{"I want to participate in the study":{"count":6}}
HPI	SoSe 2020	Q4	QX07	Should personal genotyping be allowed without genetic counseling by a medical professional?​	Yes: 2 No: 8	{"Yes":{"count":2},"No":{"count":8}}
HPI	SoSe 2021	Q1	QX07	Should personal genotyping be allowed without genetic counseling by a medical professional?​	Not answered: 1 No: 12 Yes: 3	{"Not answered":{"count":1},"No":{"count":12},"Yes":{"count":3}}
HPI	SoSe 2021	Q2	QX07	Should personal genotyping be allowed without genetic counseling by a medical professional?​	No: 13 Yes: 2	{"No":{"count":13},"Yes":{"count":2}}
HPI	SoSe 2021	Q3	QX07	Should personal genotyping be allowed without genetic counseling by a medical professional?​	No: 8 Yes: 1	{"No":{"count":8},"Yes":{"count":1}}
HPI	SoSe 2021	Q4	QX07	Should personal genotyping be allowed without genetic counseling by a medical professional?​	No: 7 Yes: 2	{"No":{"count":7},"Yes":{"count":2}}
TUM	Before WiSe 2020/21	Q4'	QX07	Should personal genotyping be allowed without genetic counseling by a medical professional?​	No: 32 Yes: 15	{"No":{"count":32},"Yes":{"count":15}}
TUM	WiSe 2020/21	Q1	QX07	Should personal genotyping be allowed without genetic counseling by a medical professional?​	No: 8	{"No":{"count":8}}
TUM	WiSe 2020/21	Q2	QX07	Should personal genotyping be allowed without genetic counseling by a medical professional?​	Yes: 1 No: 7	{"Yes":{"count":1},"No":{"count":7}}
TUM	WiSe 2020/21	Q3	QX07	Should personal genotyping be allowed without genetic counseling by a medical professional?​	Yes: 1 No: 6	{"Yes":{"count":1},"No":{"count":6}}
TUM	WiSe 2020/21	Q4	QX07	Should personal genotyping be allowed without genetic counseling by a medical professional?​	Yes: 1 No: 5	{"Yes":{"count":1},"No":{"count":5}}
HPI	SoSe 2020	Q4	QX08	Did you participate in personal genotyping as part of the course?​	Yes: 10	{"Yes":{"count":10}}
HPI	SoSe 2021	Q2	QX08	Did you participate in personal genotyping as part of the course?​	Yes: 11 No: 4	{"Yes":{"count":11},"No":{"count":4}}
HPI	SoSe 2021	Q3	QX08	Did you participate in personal genotyping as part of the course?​	No: 1 Yes: 8	{"No":{"count":1},"Yes":{"count":8}}
HPI	SoSe 2021	Q4	QX08	Did you participate in personal genotyping as part of the course?​	Yes: 7 No: 2	{"Yes":{"count":7},"No":{"count":2}}
TUM	Before WiSe 2020/21	Q4'	QX08	Did you participate in personal genotyping as part of the course?​	Yes: 38 No: 9	{"Yes":{"count":38},"No":{"count":9}}
TUM	WiSe 2020/21	Q2	QX08	Did you participate in personal genotyping as part of the course?​	Yes: 8	{"Yes":{"count":8}}
TUM	WiSe 2020/21	Q3	QX08	Did you participate in personal genotyping as part of the course?​	Yes: 7	{"Yes":{"count":7}}
TUM	WiSe 2020/21	Q4	QX08	Did you participate in personal genotyping as part of the course?​	Yes: 6	{"Yes":{"count":6}}
HPI	SoSe 2021	Q2	QX10	From today's perspective, would you have yourself genotyped again?	Yes: 10 Question not asked: 4 No: 1	{"Yes":{"count":10},"Question not asked":{"count":4},"No":{"count":1}}
HPI	SoSe 2021	Q3	QX10	From today's perspective, would you have yourself genotyped again?	Question not asked: 1 Yes: 7 No: 1	{"Question not asked":{"count":1},"Yes":{"count":7},"No":{"count":1}}
HPI	SoSe 2021	Q4	QX10	From today's perspective, would you have yourself genotyped again?	Yes: 6 Not answered: 1 No: 1 Question not asked: 1	{"Yes":{"count":6},"Not answered":{"count":1},"No":{"count":1},"Question not asked":{"count":1}}
TUM	WiSe 2020/21	Q2	QX10	From today's perspective, would you have yourself genotyped again?	Yes: 8	{"Yes":{"count":8}}
TUM	WiSe 2020/21	Q3	QX10	From today's perspective, would you have yourself genotyped again?	Yes: 7	{"Yes":{"count":7}}
TUM	WiSe 2020/21	Q4	QX10	From today's perspective, would you have yourself genotyped again?	Yes: 6	{"Yes":{"count":6}}
HPI	SoSe 2020	Q4	QX11	Would you have participated in personal genotyping as part of the course if it had been offered via a non-european private company, such as 23andMe?	Yes: 5 No: 5	{"Yes":{"count":5},"No":{"count":5}}
HPI	SoSe 2021	Q1	QX11	Would you have participated in personal genotyping as part of the course if it had been offered via a non-european private company, such as 23andMe?	Yes: 10 No: 6	{"Yes":{"count":10},"No":{"count":6}}
HPI	SoSe 2021	Q2	QX11	Would you have participated in personal genotyping as part of the course if it had been offered via a non-european private company, such as 23andMe?	No: 10 Yes: 5	{"No":{"count":10},"Yes":{"count":5}}
HPI	SoSe 2021	Q3	QX11	Would you have participated in personal genotyping as part of the course if it had been offered via a non-european private company, such as 23andMe?	No: 8 Yes: 1	{"No":{"count":8},"Yes":{"count":1}}
HPI	SoSe 2021	Q4	QX11	Would you have participated in personal genotyping as part of the course if it had been offered via a non-european private company, such as 23andMe?	No: 7 Yes: 2	{"No":{"count":7},"Yes":{"count":2}}
TUM	Before WiSe 2020/21	Q4'	QX11	Would you have participated in personal genotyping as part of the course if it had been offered via a non-european private company, such as 23andMe?	No: 37 Yes: 10	{"No":{"count":37},"Yes":{"count":10}}
TUM	WiSe 2020/21	Q2	QX11	Would you have participated in personal genotyping as part of the course if it had been offered via a non-european private company, such as 23andMe?	No: 6 Yes: 2	{"No":{"count":6},"Yes":{"count":2}}
TUM	WiSe 2020/21	Q3	QX11	Would you have participated in personal genotyping as part of the course if it had been offered via a non-european private company, such as 23andMe?	No: 6 Yes: 1	{"No":{"count":6},"Yes":{"count":1}}
TUM	WiSe 2020/21	Q4	QX11	Would you have participated in personal genotyping as part of the course if it had been offered via a non-european private company, such as 23andMe?	No: 5 Yes: 1	{"No":{"count":5},"Yes":{"count":1}}
HPI	SoSe 2020	Q4	QX12	Would you recommend personal genotyping to relatives or friends who have not taken the course?	Yes: 6 No: 4	{"Yes":{"count":6},"No":{"count":4}}
HPI	SoSe 2021	Q1	QX12	Would you recommend personal genotyping to relatives or friends who have not taken the course?	Not answered: 1 No: 7 Yes: 8	{"Not answered":{"count":1},"No":{"count":7},"Yes":{"count":8}}
HPI	SoSe 2021	Q2	QX12	Would you recommend personal genotyping to relatives or friends who have not taken the course?	Yes: 11 No: 4	{"Yes":{"count":11},"No":{"count":4}}
HPI	SoSe 2021	Q3	QX12	Would you recommend personal genotyping to relatives or friends who have not taken the course?	No: 3 Yes: 6	{"No":{"count":3},"Yes":{"count":6}}
HPI	SoSe 2021	Q4	QX12	Would you recommend personal genotyping to relatives or friends who have not taken the course?	Yes: 7 No: 2	{"Yes":{"count":7},"No":{"count":2}}
TUM	Before WiSe 2020/21	Q4'	QX12	Would you recommend personal genotyping to relatives or friends who have not taken the course?	No: 32 Yes: 15	{"No":{"count":32},"Yes":{"count":15}}
TUM	WiSe 2020/21	Q2	QX12	Would you recommend personal genotyping to relatives or friends who have not taken the course?	Yes: 2 No: 6	{"Yes":{"count":2},"No":{"count":6}}
TUM	WiSe 2020/21	Q3	QX12	Would you recommend personal genotyping to relatives or friends who have not taken the course?	Yes: 3 No: 4	{"Yes":{"count":3},"No":{"count":4}}
TUM	WiSe 2020/21	Q4	QX12	Would you recommend personal genotyping to relatives or friends who have not taken the course?	Yes: 1 No: 5	{"Yes":{"count":1},"No":{"count":5}}
HPI	SoSe 2020	Q4	QX13	How important do you consider the treatment of ethical aspects in the AYPG course?	Absolutely necessary: 4 Neutral: 1 Rather important: 5	{"Absolutely necessary":{"count":4},"Neutral":{"count":1},"Rather important":{"count":5}}
HPI	SoSe 2021	Q1	QX13	How important do you consider the treatment of ethical aspects in the AYPG course?	Not answered: 1 Absolutely necessary: 10 Rather important: 5	{"Not answered":{"count":1},"Absolutely necessary":{"count":10},"Rather important":{"count":5}}
HPI	SoSe 2021	Q2	QX13	How important do you consider the treatment of ethical aspects in the AYPG course?	Absolutely necessary: 8 Rather important: 6 Neutral: 1	{"Absolutely necessary":{"count":8},"Rather important":{"count":6},"Neutral":{"count":1}}
HPI	SoSe 2021	Q3	QX13	How important do you consider the treatment of ethical aspects in the AYPG course?	Absolutely necessary: 5 Rather important: 4	{"Absolutely necessary":{"count":5},"Rather important":{"count":4}}
HPI	SoSe 2021	Q4	QX13	How important do you consider the treatment of ethical aspects in the AYPG course?	Absolutely necessary: 8 Rather important: 1	{"Absolutely necessary":{"count":8},"Rather important":{"count":1}}
TUM	Before WiSe 2020/21	Q4'	QX13	How important do you consider the treatment of ethical aspects in the AYPG course?	Absolutely necessary: 36 Rather important: 6 Neutral: 5	{"Absolutely necessary":{"count":36},"Rather important":{"count":6},"Neutral":{"count":5}}
TUM	WiSe 2020/21	Q2	QX13	How important do you consider the treatment of ethical aspects in the AYPG course?	Absolutely necessary: 6 Rather important: 2	{"Absolutely necessary":{"count":6},"Rather important":{"count":2}}
TUM	WiSe 2020/21	Q3	QX13	How important do you consider the treatment of ethical aspects in the AYPG course?	Absolutely necessary: 6 Rather important: 1	{"Absolutely necessary":{"count":6},"Rather important":{"count":1}}
TUM	WiSe 2020/21	Q4	QX13	How important do you consider the treatment of ethical aspects in the AYPG course?	Rather important: 2 Absolutely necessary: 4	{"Rather important":{"count":2},"Absolutely necessary":{"count":4}}
TUM	Before WiSe 2020/21	Q4'	QX14	Do you think that a similar course should be obligatory in medical studies at universities?	Yes: 30 No: 17	{"Yes":{"count":30},"No":{"count":17}}
TUM	WiSe 2020/21	Q2	QX14	Do you think that a similar course should be obligatory in medical studies at universities?	Yes: 5 No: 3	{"Yes":{"count":5},"No":{"count":3}}
TUM	WiSe 2020/21	Q3	QX14	Do you think that a similar course should be obligatory in medical studies at universities?	Yes: 5 No: 2	{"Yes":{"count":5},"No":{"count":2}}
TUM	WiSe 2020/21	Q4	QX14	Do you think that a similar course should be obligatory in medical studies at universities?	Yes: 4 No: 2	{"Yes":{"count":4},"No":{"count":2}}
HPI	SoSe 2020	Q4	QX15	Would you recommend to offer personal genotyping in future courses again?​	Yes: 10	{"Yes":{"count":10}}
HPI	SoSe 2021	Q3	QX15	Would you recommend to offer personal genotyping in future courses again?​	No: 1 Yes: 8	{"No":{"count":1},"Yes":{"count":8}}
HPI	SoSe 2021	Q4	QX15	Would you recommend to offer personal genotyping in future courses again?​	Yes: 8 No: 1	{"Yes":{"count":8},"No":{"count":1}}
TUM	Before WiSe 2020/21	Q4'	QX15	Would you recommend to offer personal genotyping in future courses again?​	Yes: 46 No: 1	{"Yes":{"count":46},"No":{"count":1}}
TUM	WiSe 2020/21	Q3	QX15	Would you recommend to offer personal genotyping in future courses again?​	Yes: 7	{"Yes":{"count":7}}
TUM	WiSe 2020/21	Q4	QX15	Would you recommend to offer personal genotyping in future courses again?​	Yes: 6	{"Yes":{"count":6}}
HPI	SoSe 2020	Q4	QX16	Do you think that personal genotyping in the course context is useful for the learning experience?​	Yes: 9 No: 1	{"Yes":{"count":9},"No":{"count":1}}
HPI	SoSe 2021	Q3	QX16	Do you think that personal genotyping in the course context is useful for the learning experience?​	No: 4 Yes: 5	{"No":{"count":4},"Yes":{"count":5}}
HPI	SoSe 2021	Q4	QX16	Do you think that personal genotyping in the course context is useful for the learning experience?​	Yes: 8 No: 1	{"Yes":{"count":8},"No":{"count":1}}
TUM	Before WiSe 2020/21	Q4'	QX16	Do you think that personal genotyping in the course context is useful for the learning experience?​	Yes: 43 No: 4	{"Yes":{"count":43},"No":{"count":4}}
TUM	WiSe 2020/21	Q3	QX16	Do you think that personal genotyping in the course context is useful for the learning experience?​	Yes: 7	{"Yes":{"count":7}}
TUM	WiSe 2020/21	Q4	QX16	Do you think that personal genotyping in the course context is useful for the learning experience?​	Yes: 6	{"Yes":{"count":6}}
HPI	SoSe 2020	Q4	QX17	How did the course change your attitude?	More negative: 7 Question not asked: 3	{"More negative":{"count":7},"Question not asked":{"count":3}}
HPI	SoSe 2021	Q3	QX17	How did the course change your attitude?	Question not asked: 5 More negative: 3 More positive: 1	{"Question not asked":{"count":5},"More negative":{"count":3},"More positive":{"count":1}}
HPI	SoSe 2021	Q4	QX17	How did the course change your attitude?	More positive: 4 More negative: 4 Question not asked: 1	{"More positive":{"count":4},"More negative":{"count":4},"Question not asked":{"count":1}}
TUM	Before WiSe 2020/21	Q4'	QX17	How did the course change your attitude?	Question not asked: 24 More negative: 16 More positive: 7	{"Question not asked":{"count":24},"More negative":{"count":16},"More positive":{"count":7}}
TUM	WiSe 2020/21	Q3	QX17	How did the course change your attitude?	Question not asked: 3 More negative: 2 More positive: 2	{"Question not asked":{"count":3},"More negative":{"count":2},"More positive":{"count":2}}
TUM	WiSe 2020/21	Q4	QX17	How did the course change your attitude?	Question not asked: 4 More negative: 2	{"Question not asked":{"count":4},"More negative":{"count":2}}
HPI	SoSe 2020	Q4	QX18	Has this course changed your attitude towards personal genotype analysis?	Yes: 7 I don't know: 2 No: 1	{"Yes":{"count":7},"I don't know":{"count":2},"No":{"count":1}}
HPI	SoSe 2021	Q3	QX18	Has this course changed your attitude towards personal genotype analysis?	No: 6 Yes: 3	{"No":{"count":6},"Yes":{"count":3}}
HPI	SoSe 2021	Q4	QX18	Has this course changed your attitude towards personal genotype analysis?	Yes: 8 No: 1	{"Yes":{"count":8},"No":{"count":1}}
TUM	Before WiSe 2020/21	Q4'	QX18	Has this course changed your attitude towards personal genotype analysis?	No: 21 Yes: 23 I don't know: 3	{"No":{"count":21},"Yes":{"count":23},"I don't know":{"count":3}}
TUM	WiSe 2020/21	Q3	QX18	Has this course changed your attitude towards personal genotype analysis?	No: 2 Yes: 4 I don't know: 1	{"No":{"count":2},"Yes":{"count":4},"I don't know":{"count":1}}
TUM	WiSe 2020/21	Q4	QX18	Has this course changed your attitude towards personal genotype analysis?	No: 3 Yes: 2 I don't know: 1	{"No":{"count":3},"Yes":{"count":2},"I don't know":{"count":1}}
HPI	SoSe 2020	Q4	QX19	Do you feel adequately trained to analyze and interpret genomic data beyond the course?​	Yes: 5 No: 5	{"Yes":{"count":5},"No":{"count":5}}
HPI	SoSe 2021	Q3	QX19	Do you feel adequately trained to analyze and interpret genomic data beyond the course?​	No: 5 Yes: 4	{"No":{"count":5},"Yes":{"count":4}}
HPI	SoSe 2021	Q4	QX19	Do you feel adequately trained to analyze and interpret genomic data beyond the course?​	No: 6 Yes: 3	{"No":{"count":6},"Yes":{"count":3}}
TUM	WiSe 2020/21	Q4	QX19	Do you feel adequately trained to analyze and interpret genomic data beyond the course?​	No: 4 Yes: 2	{"No":{"count":4},"Yes":{"count":2}}
HPI	SoSe 2020	Q4	Q402	Did you collect the password for your complete genotype data?​	Yes: 6 No: 4	{"Yes":{"count":6},"No":{"count":4}}
HPI	SoSe 2021	Q4	Q402	Did you collect the password for your complete genotype data?​	Yes: 7 Question not asked: 2	{"Yes":{"count":7},"Question not asked":{"count":2}}
TUM	Before WiSe 2020/21	Q4'	Q402	Did you collect the password for your complete genotype data?​	Yes: 29 Question not asked: 9 No: 9	{"Yes":{"count":29},"Question not asked":{"count":9},"No":{"count":9}}
TUM	WiSe 2020/21	Q4	Q402	Did you collect the password for your complete genotype data?​	Yes: 6	{"Yes":{"count":6}}
HPI	SoSe 2020	Q4	Q404_02	Did you conduct analyses with your own data beyond the course?​ Option: Analyzing genetic ancestry​	No: 4 Yes: 2 Question not asked: 4	{"No":{"count":4},"Yes":{"count":2},"Question not asked":{"count":4}}
HPI	SoSe 2021	Q4	Q404_02	Did you conduct analyses with your own data beyond the course?​ Option: Analyzing genetic ancestry​	No: 7 Question not asked: 2	{"No":{"count":7},"Question not asked":{"count":2}}
TUM	WiSe 2020/21	Q4	Q404_02	Did you conduct analyses with your own data beyond the course?​ Option: Analyzing genetic ancestry​	No: 4 Yes: 2	{"No":{"count":4},"Yes":{"count":2}}
HPI	SoSe 2020	Q4	Q404_03	Did you conduct analyses with your own data beyond the course?​ Option: Analyzing pharmacogenomic markers (medication effects)​	Yes: 1 No: 5 Question not asked: 4	{"Yes":{"count":1},"No":{"count":5},"Question not asked":{"count":4}}
HPI	SoSe 2021	Q4	Q404_03	Did you conduct analyses with your own data beyond the course?​ Option: Analyzing pharmacogenomic markers (medication effects)​	No: 6 Question not asked: 2 Yes: 1	{"No":{"count":6},"Question not asked":{"count":2},"Yes":{"count":1}}
TUM	WiSe 2020/21	Q4	Q404_03	Did you conduct analyses with your own data beyond the course?​ Option: Analyzing pharmacogenomic markers (medication effects)​	Yes: 4 No: 2	{"Yes":{"count":4},"No":{"count":2}}
HPI	SoSe 2020	Q4	Q404_04	Did you conduct analyses with your own data beyond the course?​ Option: Analyzing wellness traits (not disease-relevant, e.g., eye color or blood type)​	No: 5 Yes: 1 Question not asked: 4	{"No":{"count":5},"Yes":{"count":1},"Question not asked":{"count":4}}
HPI	SoSe 2021	Q4	Q404_04	Did you conduct analyses with your own data beyond the course?​ Option: Analyzing wellness traits (not disease-relevant, e.g., eye color or blood type)​	No: 4 Question not asked: 2 Yes: 3	{"No":{"count":4},"Question not asked":{"count":2},"Yes":{"count":3}}
TUM	WiSe 2020/21	Q4	Q404_04	Did you conduct analyses with your own data beyond the course?​ Option: Analyzing wellness traits (not disease-relevant, e.g., eye color or blood type)​	No: 5 Yes: 1	{"No":{"count":5},"Yes":{"count":1}}
HPI	SoSe 2020	Q4	Q404_06	Did you conduct analyses with your own data beyond the course?​ Option: Carrier detection of risk variants for monogenetic diseases​	No: 6 Question not asked: 4	{"No":{"count":6},"Question not asked":{"count":4}}
HPI	SoSe 2021	Q4	Q404_06	Did you conduct analyses with your own data beyond the course?​ Option: Carrier detection of risk variants for monogenetic diseases​	No: 6 Question not asked: 2 Yes: 1	{"No":{"count":6},"Question not asked":{"count":2},"Yes":{"count":1}}
TUM	WiSe 2020/21	Q4	Q404_06	Did you conduct analyses with your own data beyond the course?​ Option: Carrier detection of risk variants for monogenetic diseases​	No: 4 Yes: 2	{"No":{"count":4},"Yes":{"count":2}}
HPI	SoSe 2020	Q4	Q404_07	Did you conduct analyses with your own data beyond the course?​ Option: Analyzing risk of (common) polygenic diseases​	No: 6 Question not asked: 4	{"No":{"count":6},"Question not asked":{"count":4}}
HPI	SoSe 2021	Q4	Q404_07	Did you conduct analyses with your own data beyond the course?​ Option: Analyzing risk of (common) polygenic diseases​	No: 7 Question not asked: 2	{"No":{"count":7},"Question not asked":{"count":2}}
TUM	WiSe 2020/21	Q4	Q404_07	Did you conduct analyses with your own data beyond the course?​ Option: Analyzing risk of (common) polygenic diseases​	No: 4 Yes: 2	{"No":{"count":4},"Yes":{"count":2}}
HPI	SoSe 2020	Q4	Q404_01	Did you conduct analyses with your own data beyond the course?​ Option: No, I just wanted to receive my data​	No: 4 Yes: 2 Question not asked: 4	{"No":{"count":4},"Yes":{"count":2},"Question not asked":{"count":4}}
HPI	SoSe 2021	Q4	Q404_01	Did you conduct analyses with your own data beyond the course?​ Option: No, I just wanted to receive my data​	Yes: 4 Question not asked: 2 No: 3	{"Yes":{"count":4},"Question not asked":{"count":2},"No":{"count":3}}
TUM	WiSe 2020/21	Q4	Q404_01	Did you conduct analyses with your own data beyond the course?​ Option: No, I just wanted to receive my data​	No: 4 Yes: 2	{"No":{"count":4},"Yes":{"count":2}}
HPI	SoSe 2020	Q4	Q405	Do you plan to conduct further analyses with your own genomic data?​	No: 2 Yes: 7 Question not asked: 1	{"No":{"count":2},"Yes":{"count":7},"Question not asked":{"count":1}}
HPI	SoSe 2021	Q4	Q405	Do you plan to conduct further analyses with your own genomic data?​	Yes: 7 Question not asked: 2	{"Yes":{"count":7},"Question not asked":{"count":2}}
TUM	Before WiSe 2020/21	Q4'	Q405	Do you plan to conduct further analyses with your own genomic data?​	Yes: 16 No: 13 Question not asked: 18	{"Yes":{"count":16},"No":{"count":13},"Question not asked":{"count":18}}
TUM	WiSe 2020/21	Q4	Q405	Do you plan to conduct further analyses with your own genomic data?​	Yes: 6	{"Yes":{"count":6}}
HPI	SoSe 2020	Q4	QX04	Did you study medicine?	No: 8 Yes: 2	{"No":{"count":8},"Yes":{"count":2}}
HPI	SoSe 2021	Q1	QX04	Did you study medicine?	No: 10 Yes: 6	{"No":{"count":10},"Yes":{"count":6}}
HPI	SoSe 2021	Q2	QX04	Did you study medicine?	No: 9 Yes: 6	{"No":{"count":9},"Yes":{"count":6}}
HPI	SoSe 2021	Q3	QX04	Did you study medicine?	Yes: 3 No: 6	{"Yes":{"count":3},"No":{"count":6}}
HPI	SoSe 2021	Q4	QX04	Did you study medicine?	No: 7 Yes: 2	{"No":{"count":7},"Yes":{"count":2}}
HPI	SoSe 2021	Q1	QX05	Do you plan to collect the password for your complete genomic data at the end of the course?​	Yes: 13 Question not asked: 1 No: 2	{"Yes":{"count":13},"Question not asked":{"count":1},"No":{"count":2}}
HPI	SoSe 2021	Q2	QX05	Do you plan to collect the password for your complete genomic data at the end of the course?​	Yes: 10 Question not asked: 4 No: 1	{"Yes":{"count":10},"Question not asked":{"count":4},"No":{"count":1}}
HPI	SoSe 2021	Q3	QX05	Do you plan to collect the password for your complete genomic data at the end of the course?​	Question not asked: 1 Yes: 8	{"Question not asked":{"count":1},"Yes":{"count":8}}
TUM	WiSe 2020/21	Q1	QX05	Do you plan to collect the password for your complete genomic data at the end of the course?​	Yes: 8	{"Yes":{"count":8}}
TUM	WiSe 2020/21	Q2	QX05	Do you plan to collect the password for your complete genomic data at the end of the course?​	Yes: 8	{"Yes":{"count":8}}
HPI	SoSe 2021	Q1	QX06_02	Which analyses would you to conduct with your own data?​ Option: Analyzing genetic ancestry​	No: 4 Question not asked: 3 Yes: 9	{"No":{"count":4},"Question not asked":{"count":3},"Yes":{"count":9}}
HPI	SoSe 2021	Q2	QX06_02	Which analyses would you to conduct with your own data?​ Option: Analyzing genetic ancestry​	Yes: 8 Question not asked: 5 No: 2	{"Yes":{"count":8},"Question not asked":{"count":5},"No":{"count":2}}
HPI	SoSe 2021	Q3	QX06_02	Which analyses would you to conduct with your own data?​ Option: Analyzing genetic ancestry​	Question not asked: 1 No: 2 Yes: 6	{"Question not asked":{"count":1},"No":{"count":2},"Yes":{"count":6}}
TUM	WiSe 2020/21	Q1	QX06_02	Which analyses would you to conduct with your own data?​ Option: Analyzing genetic ancestry​	Yes: 3 No: 5	{"Yes":{"count":3},"No":{"count":5}}
TUM	WiSe 2020/21	Q2	QX06_02	Which analyses would you to conduct with your own data?​ Option: Analyzing genetic ancestry​	No: 3 Yes: 5	{"No":{"count":3},"Yes":{"count":5}}
TUM	WiSe 2020/21	Q3	QX06_02	Which analyses would you to conduct with your own data?​ Option: Analyzing genetic ancestry​	No: 2 Yes: 5	{"No":{"count":2},"Yes":{"count":5}}
HPI	SoSe 2021	Q1	QX06_03	Which analyses would you to conduct with your own data?​ Option: Analyzing pharmacogenomic markers (medication effects)​	No: 4 Question not asked: 3 Yes: 9	{"No":{"count":4},"Question not asked":{"count":3},"Yes":{"count":9}}
HPI	SoSe 2021	Q2	QX06_03	Which analyses would you to conduct with your own data?​ Option: Analyzing pharmacogenomic markers (medication effects)​	Yes: 8 Question not asked: 5 No: 2	{"Yes":{"count":8},"Question not asked":{"count":5},"No":{"count":2}}
HPI	SoSe 2021	Q3	QX06_03	Which analyses would you to conduct with your own data?​ Option: Analyzing pharmacogenomic markers (medication effects)​	Question not asked: 1 Yes: 8	{"Question not asked":{"count":1},"Yes":{"count":8}}
TUM	WiSe 2020/21	Q1	QX06_03	Which analyses would you to conduct with your own data?​ Option: Analyzing pharmacogenomic markers (medication effects)​	Yes: 6 No: 2	{"Yes":{"count":6},"No":{"count":2}}
TUM	WiSe 2020/21	Q2	QX06_03	Which analyses would you to conduct with your own data?​ Option: Analyzing pharmacogenomic markers (medication effects)​	Yes: 8	{"Yes":{"count":8}}
TUM	WiSe 2020/21	Q3	QX06_03	Which analyses would you to conduct with your own data?​ Option: Analyzing pharmacogenomic markers (medication effects)​	Yes: 7	{"Yes":{"count":7}}
HPI	SoSe 2021	Q1	QX06_04	Which analyses would you to conduct with your own data?​ Option: Analyzing wellness traits (not disease-relevant, e.g., eye color or blood type)​	No: 5 Question not asked: 3 Yes: 8	{"No":{"count":5},"Question not asked":{"count":3},"Yes":{"count":8}}
HPI	SoSe 2021	Q2	QX06_04	Which analyses would you to conduct with your own data?​ Option: Analyzing wellness traits (not disease-relevant, e.g., eye color or blood type)​	Yes: 9 Question not asked: 5 No: 1	{"Yes":{"count":9},"Question not asked":{"count":5},"No":{"count":1}}
HPI	SoSe 2021	Q3	QX06_04	Which analyses would you to conduct with your own data?​ Option: Analyzing wellness traits (not disease-relevant, e.g., eye color or blood type)​	Question not asked: 1 Yes: 8	{"Question not asked":{"count":1},"Yes":{"count":8}}
TUM	WiSe 2020/21	Q1	QX06_04	Which analyses would you to conduct with your own data?​ Option: Analyzing wellness traits (not disease-relevant, e.g., eye color or blood type)​	Yes: 6 No: 2	{"Yes":{"count":6},"No":{"count":2}}
TUM	WiSe 2020/21	Q2	QX06_04	Which analyses would you to conduct with your own data?​ Option: Analyzing wellness traits (not disease-relevant, e.g., eye color or blood type)​	Yes: 6 No: 2	{"Yes":{"count":6},"No":{"count":2}}
TUM	WiSe 2020/21	Q3	QX06_04	Which analyses would you to conduct with your own data?​ Option: Analyzing wellness traits (not disease-relevant, e.g., eye color or blood type)​	Yes: 6 No: 1	{"Yes":{"count":6},"No":{"count":1}}
HPI	SoSe 2021	Q1	QX06_06	Which analyses would you to conduct with your own data?​ Option: Carrier detection of risk variants for monogenetic diseases​	No: 2 Question not asked: 3 Yes: 11	{"No":{"count":2},"Question not asked":{"count":3},"Yes":{"count":11}}
HPI	SoSe 2021	Q2	QX06_06	Which analyses would you to conduct with your own data?​ Option: Carrier detection of risk variants for monogenetic diseases​	Yes: 8 Question not asked: 5 No: 2	{"Yes":{"count":8},"Question not asked":{"count":5},"No":{"count":2}}
HPI	SoSe 2021	Q3	QX06_06	Which analyses would you to conduct with your own data?​ Option: Carrier detection of risk variants for monogenetic diseases​	Question not asked: 1 Yes: 8	{"Question not asked":{"count":1},"Yes":{"count":8}}
TUM	WiSe 2020/21	Q1	QX06_06	Which analyses would you to conduct with your own data?​ Option: Carrier detection of risk variants for monogenetic diseases​	Yes: 8	{"Yes":{"count":8}}
TUM	WiSe 2020/21	Q2	QX06_06	Which analyses would you to conduct with your own data?​ Option: Carrier detection of risk variants for monogenetic diseases​	Yes: 7 No: 1	{"Yes":{"count":7},"No":{"count":1}}
TUM	WiSe 2020/21	Q3	QX06_06	Which analyses would you to conduct with your own data?​ Option: Carrier detection of risk variants for monogenetic diseases​	Yes: 6 No: 1	{"Yes":{"count":6},"No":{"count":1}}
HPI	SoSe 2021	Q1	QX06_07	Which analyses would you to conduct with your own data?​ Option: Analyzing risk of (common) polygenic diseases​	No: 2 Question not asked: 3 Yes: 11	{"No":{"count":2},"Question not asked":{"count":3},"Yes":{"count":11}}
HPI	SoSe 2021	Q2	QX06_07	Which analyses would you to conduct with your own data?​ Option: Analyzing risk of (common) polygenic diseases​	No: 3 Question not asked: 5 Yes: 7	{"No":{"count":3},"Question not asked":{"count":5},"Yes":{"count":7}}
HPI	SoSe 2021	Q3	QX06_07	Which analyses would you to conduct with your own data?​ Option: Analyzing risk of (common) polygenic diseases​	Question not asked: 1 Yes: 8	{"Question not asked":{"count":1},"Yes":{"count":8}}
TUM	WiSe 2020/21	Q1	QX06_07	Which analyses would you to conduct with your own data?​ Option: Analyzing risk of (common) polygenic diseases​	Yes: 7 No: 1	{"Yes":{"count":7},"No":{"count":1}}
TUM	WiSe 2020/21	Q2	QX06_07	Which analyses would you to conduct with your own data?​ Option: Analyzing risk of (common) polygenic diseases​	Yes: 6 No: 2	{"Yes":{"count":6},"No":{"count":2}}
TUM	WiSe 2020/21	Q3	QX06_07	Which analyses would you to conduct with your own data?​ Option: Analyzing risk of (common) polygenic diseases​	Yes: 6 No: 1	{"Yes":{"count":6},"No":{"count":1}}
HPI	SoSe 2021	Q1	QX06_01	Which analyses would you to conduct with your own data?​ Option: None, I just wanted to receive my data​	No: 12 Question not asked: 3 Yes: 1	{"No":{"count":12},"Question not asked":{"count":3},"Yes":{"count":1}}
HPI	SoSe 2021	Q2	QX06_01	Which analyses would you to conduct with your own data?​ Option: None, I just wanted to receive my data​	No: 9 Question not asked: 5 Yes: 1	{"No":{"count":9},"Question not asked":{"count":5},"Yes":{"count":1}}
HPI	SoSe 2021	Q3	QX06_01	Which analyses would you to conduct with your own data?​ Option: None, I just wanted to receive my data​	Question not asked: 1 No: 8	{"Question not asked":{"count":1},"No":{"count":8}}
TUM	WiSe 2020/21	Q1	QX06_01	Which analyses would you to conduct with your own data?​ Option: None, I just wanted to receive my data​	No: 8	{"No":{"count":8}}
TUM	WiSe 2020/21	Q2	QX06_01	Which analyses would you to conduct with your own data?​ Option: None, I just wanted to receive my data​	No: 8	{"No":{"count":8}}
TUM	WiSe 2020/21	Q3	QX06_01	Which analyses would you to conduct with your own data?​ Option: None, I just wanted to receive my data​	No: 7	{"No":{"count":7}}
HPI	SoSe 2021	Q2	QX09	From today's perspective, would you have yourself genotyped?	Question not asked: 11 Yes: 2 No: 2	{"Question not asked":{"count":11},"Yes":{"count":2},"No":{"count":2}}
HPI	SoSe 2021	Q3	QX09	From today's perspective, would you have yourself genotyped?	No: 1 Question not asked: 8	{"No":{"count":1},"Question not asked":{"count":8}}
HPI	SoSe 2021	Q4	QX09	From today's perspective, would you have yourself genotyped?	Question not asked: 7 No: 1 Yes: 1	{"Question not asked":{"count":7},"No":{"count":1},"Yes":{"count":1}}
HPI	SoSe 2020	Q4	Q102_01	What motivated you to participate in the course?​ Option: General interest in genomics/genomic analyses​	Yes: 10	{"Yes":{"count":10}}
HPI	SoSe 2021	Q1	Q102_01	What motivated you to participate in the course?​ Option: General interest in genomics/genomic analyses​	No: 2 Yes: 14	{"No":{"count":2},"Yes":{"count":14}}
TUM	Before WiSe 2020/21	Q4'	Q102_01	What motivated you to participate in the course?​ Option: General interest in genomics/genomic analyses​	Yes: 42 No: 5	{"Yes":{"count":42},"No":{"count":5}}
TUM	WiSe 2020/21	Q1	Q102_01	What motivated you to participate in the course?​ Option: General interest in genomics/genomic analyses​	Yes: 8	{"Yes":{"count":8}}
HPI	SoSe 2020	Q4	Q102_02	What motivated you to participate in the course?​ Option: To receive/analyze my own genomic data​	Yes: 9 No: 1	{"Yes":{"count":9},"No":{"count":1}}
HPI	SoSe 2021	Q1	Q102_02	What motivated you to participate in the course?​ Option: To receive/analyze my own genomic data​	Yes: 13 No: 3	{"Yes":{"count":13},"No":{"count":3}}
TUM	Before WiSe 2020/21	Q4'	Q102_02	What motivated you to participate in the course?​ Option: To receive/analyze my own genomic data​	Yes: 28 No: 19	{"Yes":{"count":28},"No":{"count":19}}
TUM	WiSe 2020/21	Q1	Q102_02	What motivated you to participate in the course?​ Option: To receive/analyze my own genomic data​	Yes: 7 No: 1	{"Yes":{"count":7},"No":{"count":1}}
HPI	SoSe 2020	Q4	Q102_03	What motivated you to participate in the course?​ Option: To gain knowledge about genomics/genomic analyses to apply it in my professional career​	Yes: 7 No: 3	{"Yes":{"count":7},"No":{"count":3}}
HPI	SoSe 2021	Q1	Q102_03	What motivated you to participate in the course?​ Option: To gain knowledge about genomics/genomic analyses to apply it in my professional career​	Yes: 11 No: 5	{"Yes":{"count":11},"No":{"count":5}}
TUM	Before WiSe 2020/21	Q4'	Q102_03	What motivated you to participate in the course?​ Option: To gain knowledge about genomics/genomic analyses to apply it in my professional career​	Yes: 29 No: 18	{"Yes":{"count":29},"No":{"count":18}}
HPI	SoSe 2020	Q4	Q102_04	What motivated you to participate in the course?​ Option: To receive the credit points​	No: 6 Yes: 4	{"No":{"count":6},"Yes":{"count":4}}
HPI	SoSe 2021	Q1	Q102_04	What motivated you to participate in the course?​ Option: To receive the credit points​	Yes: 7 No: 9	{"Yes":{"count":7},"No":{"count":9}}
TUM	WiSe 2020/21	Q1	Q102_04	What motivated you to participate in the course?​ Option: To receive the credit points​	Yes: 3 No: 5	{"Yes":{"count":3},"No":{"count":5}}
HPI	SoSe 2020	Q4	Q102_05	What motivated you to participate in the course?​ Option: To learn about tools for variant interpretation and analysis​	Yes: 5 No: 5	{"Yes":{"count":5},"No":{"count":5}}
HPI	SoSe 2021	Q1	Q102_05	What motivated you to participate in the course?​ Option: To learn about tools for variant interpretation and analysis​	Yes: 9 No: 7	{"Yes":{"count":9},"No":{"count":7}}
TUM	Before WiSe 2020/21	Q4'	Q102_05	What motivated you to participate in the course?​ Option: To learn about tools for variant interpretation and analysis​	Yes: 29 No: 18	{"Yes":{"count":29},"No":{"count":18}}
TUM	WiSe 2020/21	Q1	Q102_05	What motivated you to participate in the course?​ Option: To learn about tools for variant interpretation and analysis​	No: 2 Yes: 6	{"No":{"count":2},"Yes":{"count":6}}
HPI	SoSe 2020	Q4	Q102_06	What motivated you to participate in the course?​ Option: Interest in ancestry analysis​	No: 5 Yes: 5	{"No":{"count":5},"Yes":{"count":5}}
HPI	SoSe 2021	Q1	Q102_06	What motivated you to participate in the course?​ Option: Interest in ancestry analysis​	No: 9 Yes: 7	{"No":{"count":9},"Yes":{"count":7}}
TUM	Before WiSe 2020/21	Q4'	Q102_06	What motivated you to participate in the course?​ Option: Interest in ancestry analysis​	Yes: 22 No: 25	{"Yes":{"count":22},"No":{"count":25}}
TUM	WiSe 2020/21	Q1	Q102_06	What motivated you to participate in the course?​ Option: Interest in ancestry analysis​	Yes: 4 No: 4	{"Yes":{"count":4},"No":{"count":4}}
HPI	SoSe 2020	Q4	Q102_07	What motivated you to participate in the course?​ Option: Interest in pharmacogenomics (e.g., the impact of genomic variants on medication effects)​	Yes: 8 No: 2	{"Yes":{"count":8},"No":{"count":2}}
HPI	SoSe 2021	Q1	Q102_07	What motivated you to participate in the course?​ Option: Interest in pharmacogenomics (e.g., the impact of genomic variants on medication effects)​	Yes: 12 No: 4	{"Yes":{"count":12},"No":{"count":4}}
TUM	Before WiSe 2020/21	Q4'	Q102_07	What motivated you to participate in the course?​ Option: Interest in pharmacogenomics (e.g., the impact of genomic variants on medication effects)​	No: 31 Yes: 16	{"No":{"count":31},"Yes":{"count":16}}
TUM	WiSe 2020/21	Q1	Q102_07	What motivated you to participate in the course?​ Option: Interest in pharmacogenomics (e.g., the impact of genomic variants on medication effects)​	No: 3 Yes: 5	{"No":{"count":3},"Yes":{"count":5}}
HPI	SoSe 2020	Q4	Q102_08	What motivated you to participate in the course?​ Option: Interest in research topics like genome-wide association studies​	Yes: 6 No: 4	{"Yes":{"count":6},"No":{"count":4}}
HPI	SoSe 2021	Q1	Q102_08	What motivated you to participate in the course?​ Option: Interest in research topics like genome-wide association studies​	No: 7 Yes: 9	{"No":{"count":7},"Yes":{"count":9}}
TUM	Before WiSe 2020/21	Q4'	Q102_08	What motivated you to participate in the course?​ Option: Interest in research topics like genome-wide association studies​	No: 25 Yes: 22	{"No":{"count":25},"Yes":{"count":22}}
TUM	WiSe 2020/21	Q1	Q102_08	What motivated you to participate in the course?​ Option: Interest in research topics like genome-wide association studies​	No: 5 Yes: 3	{"No":{"count":5},"Yes":{"count":3}}
HPI	SoSe 2020	Q4	Q102_09	What motivated you to participate in the course?​ Option: Interest in commercial genomic testing ("direct-to-consumer testing")​	Yes: 3 No: 7	{"Yes":{"count":3},"No":{"count":7}}
HPI	SoSe 2021	Q1	Q102_09	What motivated you to participate in the course?​ Option: Interest in commercial genomic testing ("direct-to-consumer testing")​	No: 9 Yes: 7	{"No":{"count":9},"Yes":{"count":7}}
TUM	Before WiSe 2020/21	Q4'	Q102_09	What motivated you to participate in the course?​ Option: Interest in commercial genomic testing ("direct-to-consumer testing")​	Yes: 21 No: 26	{"Yes":{"count":21},"No":{"count":26}}
TUM	WiSe 2020/21	Q1	Q102_09	What motivated you to participate in the course?​ Option: Interest in commercial genomic testing ("direct-to-consumer testing")​	Yes: 4 No: 4	{"Yes":{"count":4},"No":{"count":4}}
HPI	SoSe 2020	Q4	Q102_10	What motivated you to participate in the course?​ Option: To better understand the situation of patients when undergoing genomic testing​	No: 6 Yes: 4	{"No":{"count":6},"Yes":{"count":4}}
HPI	SoSe 2021	Q1	Q102_10	What motivated you to participate in the course?​ Option: To better understand the situation of patients when undergoing genomic testing​	No: 10 Yes: 6	{"No":{"count":10},"Yes":{"count":6}}
TUM	Before WiSe 2020/21	Q4'	Q102_10	What motivated you to participate in the course?​ Option: To better understand the situation of patients when undergoing genomic testing​	Yes: 22 No: 25	{"Yes":{"count":22},"No":{"count":25}}
TUM	WiSe 2020/21	Q1	Q102_10	What motivated you to participate in the course?​ Option: To better understand the situation of patients when undergoing genomic testing​	Yes: 3 No: 5	{"Yes":{"count":3},"No":{"count":5}}
HPI	SoSe 2020	Q4	Q102_11	What motivated you to participate in the course?​ Option: Interest in ethical issues in the context of genomic analyses​	Yes: 5 No: 5	{"Yes":{"count":5},"No":{"count":5}}
HPI	SoSe 2021	Q1	Q102_11	What motivated you to participate in the course?​ Option: Interest in ethical issues in the context of genomic analyses​	Yes: 8 No: 8	{"Yes":{"count":8},"No":{"count":8}}
TUM	Before WiSe 2020/21	Q4'	Q102_11	What motivated you to participate in the course?​ Option: Interest in ethical issues in the context of genomic analyses​	Yes: 25 No: 22	{"Yes":{"count":25},"No":{"count":22}}
TUM	WiSe 2020/21	Q1	Q102_11	What motivated you to participate in the course?​ Option: Interest in ethical issues in the context of genomic analyses​	No: 4 Yes: 4	{"No":{"count":4},"Yes":{"count":4}}
HPI	SoSe 2020	Q4	Q102_12	What motivated you to participate in the course?​ Option: Interest in legal foundations of genomic analyses​	No: 6 Yes: 4	{"No":{"count":6},"Yes":{"count":4}}
HPI	SoSe 2021	Q1	Q102_12	What motivated you to participate in the course?​ Option: Interest in legal foundations of genomic analyses​	Yes: 9 No: 7	{"Yes":{"count":9},"No":{"count":7}}
TUM	Before WiSe 2020/21	Q4'	Q102_12	What motivated you to participate in the course?​ Option: Interest in legal foundations of genomic analyses​	Yes: 21 No: 26	{"Yes":{"count":21},"No":{"count":26}}
TUM	WiSe 2020/21	Q1	Q102_12	What motivated you to participate in the course?​ Option: Interest in legal foundations of genomic analyses​	No: 5 Yes: 3	{"No":{"count":5},"Yes":{"count":3}}
HPI	SoSe 2021	Q1	Q103	Do you plan to get genotyped as part of the course?	Yes: 15 No: 1	{"Yes":{"count":15},"No":{"count":1}}
TUM	WiSe 2020/21	Q1	Q103	Do you plan to get genotyped as part of the course?	Yes: 8	{"Yes":{"count":8}}
HPI	SoSe 2020	Q4	Q403	Do you still plan to collect the password for your complete genomic data?​	Question not asked: 6 No: 1 Yes: 3	{"Question not asked":{"count":6},"No":{"count":1},"Yes":{"count":3}}
TUM	WiSe 2020/21	Q1	QX06_05	Welche Analysen planen Sie mit Ihren Daten durchzuführen? Option: Diagnose von monogenetischen Krankheiten	Yes: 8	{"Yes":{"count":8}}
